# Supplementary material
Source: PubMed Central journal article supplement (PMC6643632)
Supplement: ao6b00362_si_001.pdf [file ao6b00362_si_001.pdf]

# Gram Scale Synthesis of a $\beta$ -Secretase 1 (BACE 1) Inhibitor

Brett D. Allison<sup>†</sup> and Neelakandha S. Mani<sup>†\*</sup>

<sup>†</sup>*Janssen Research & Development, LLC, 3210 Merryfield Row, San Diego, CA 92121*

*E-mail: [nmani@its.jnj.com](mailto:nmani@its.jnj.com), [ballison@its.jnj.com](mailto:ballison@its.jnj.com)*

## Supporting Information

### Table of Contents

|                                                                                   |    |
|-----------------------------------------------------------------------------------|----|
| Stereochemical proof of <b>rac-12</b> .....                                       | S2 |
| Copies of HPLC chromatograms, <sup>1</sup> H and <sup>13</sup> C NMR spectra..... | S5 |

The relative stereochemistry of **rac-12** was established by observation of the illustrated nOe crosspeak in the 2D-NOESY spectrum.

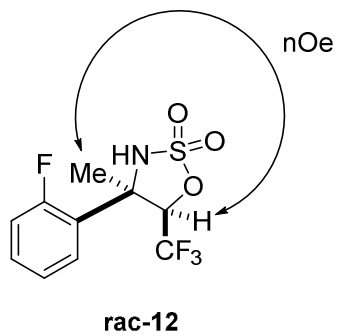

**Figure S1.** Illustration of observed nOe.

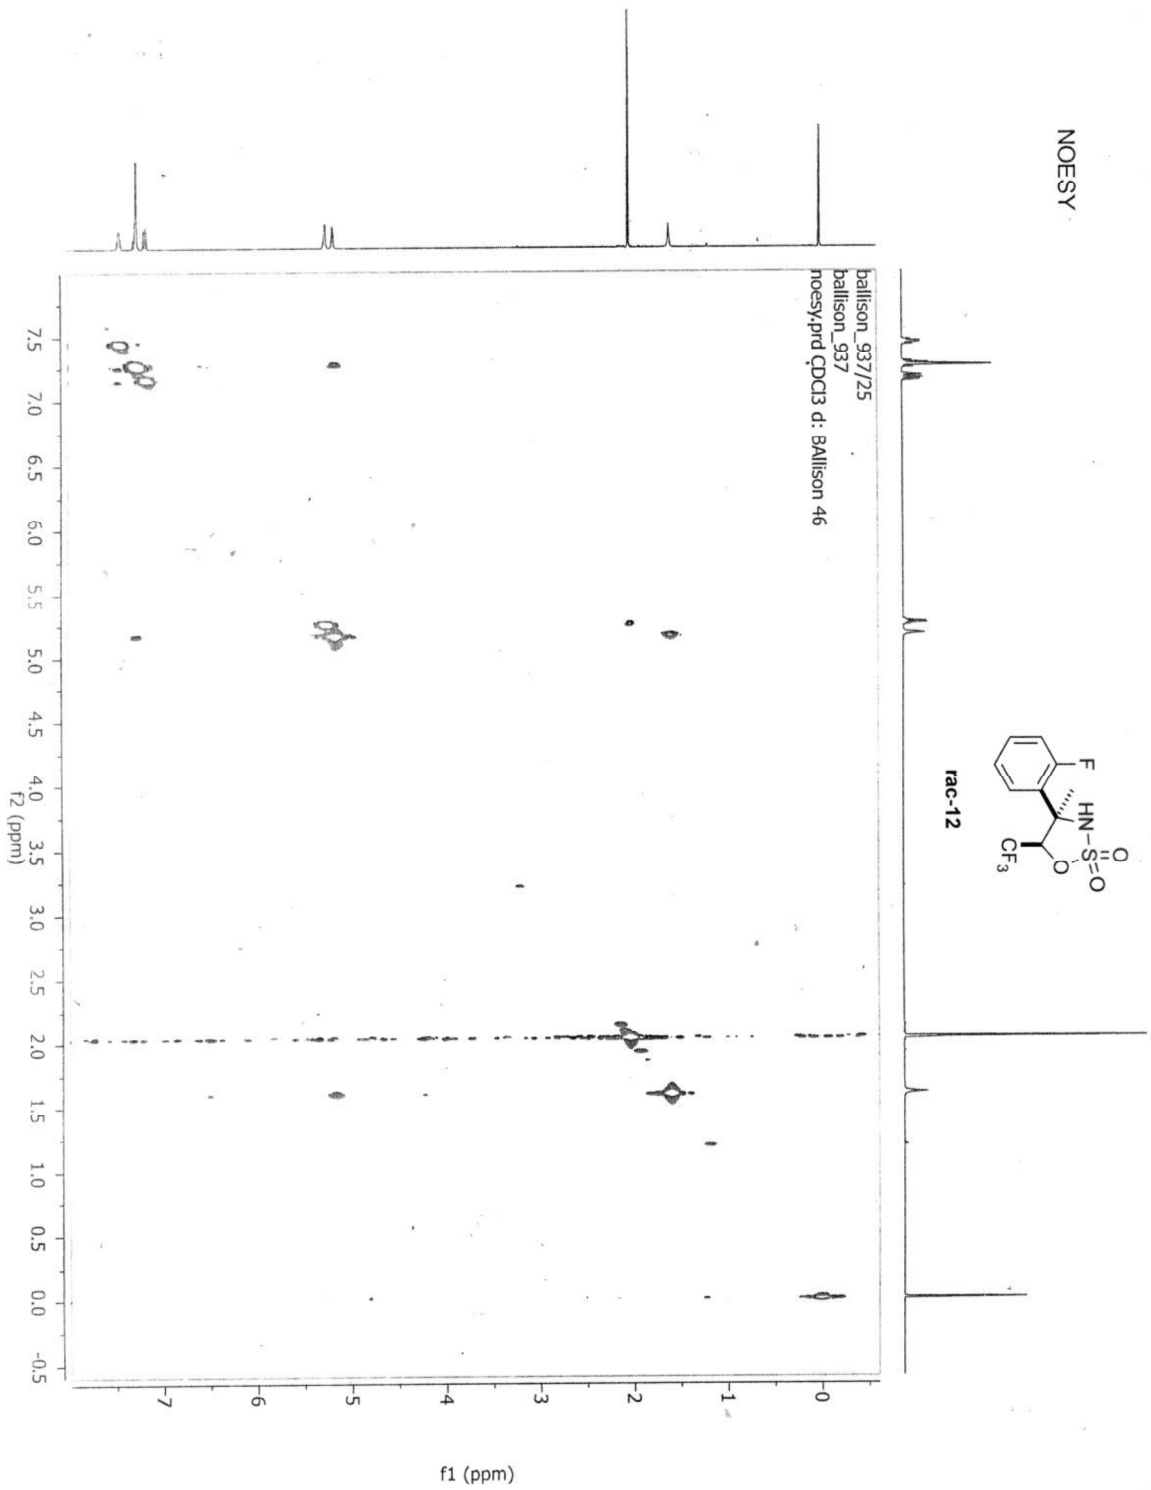

**Figure S2.** NOESY spectrum of **rac-12**.

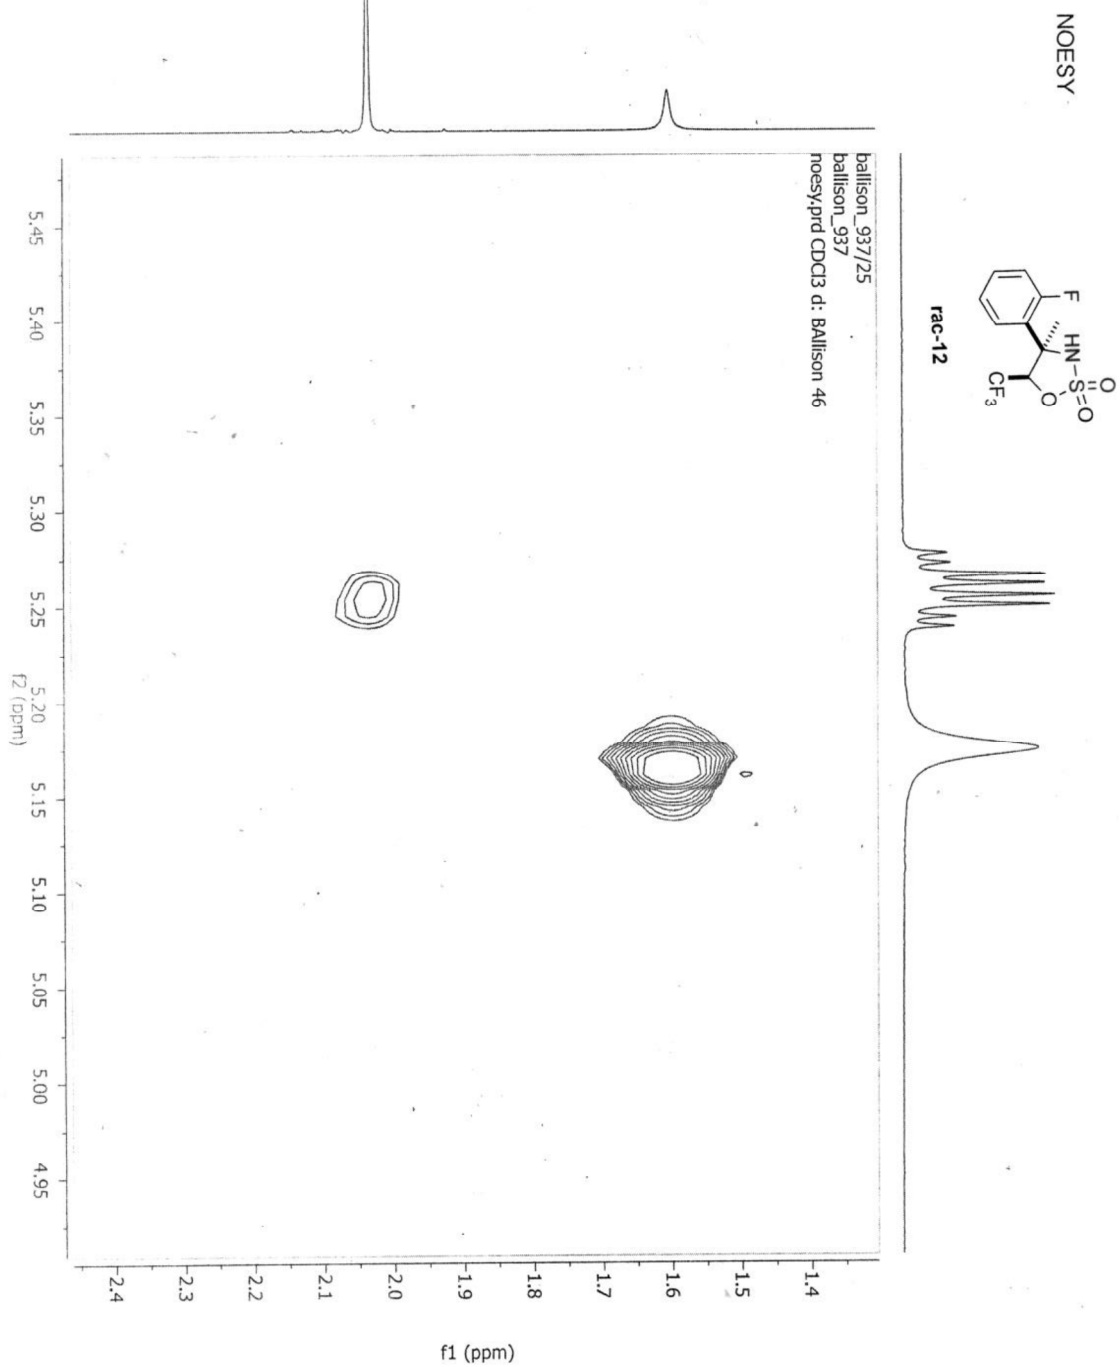

**Figure S3.** Expansion of NOESY spectrum of **rac-12** showing relevant crosspeak.

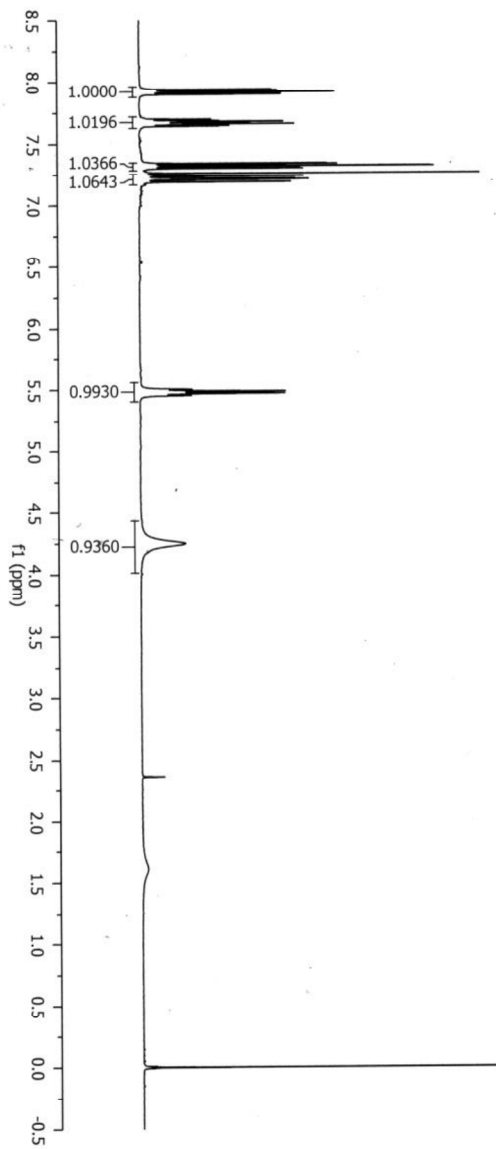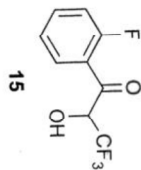

ballison\_921  
ballison\_921 crude  
proton.prd CDCl3 D:\Ballison 66

Current Data Parameters  
NAME: ballison\_921  
EXPNO: 10  
PROCNO: 1

F2 - Acquisition Parameters  
Date: 20111222  
Time: 18.01  
INSTRUM: nmr400-1  
PROBHD: 5 mm QNP 1H/13  
PULPROG: zg30  
TD: 65536  
Solvent: CDCl3  
NS: 8  
DS: 0  
SWH: 8278.1 Hz  
AQ: 3.9584243 sec  
RG: 322.5  
DM: 60.400 usec  
DE: 6.00 usec  
TE: 294.2 K  
D1: 5.00000000 sec  
TD0: 1 sec

===== CHANNEL f1 =====  
NUC1: 1H  
P1: 9.00 usec  
P1L: 0.00 dB  
SF01: 400.1324710 MHz

F2 - Processing Parameters  
SI: 0  
SF: 400.1300163 MHz  
FT: Hyper  
Phase: N0PC

Figure S4. <sup>1</sup>H NMR spectrum of 15.

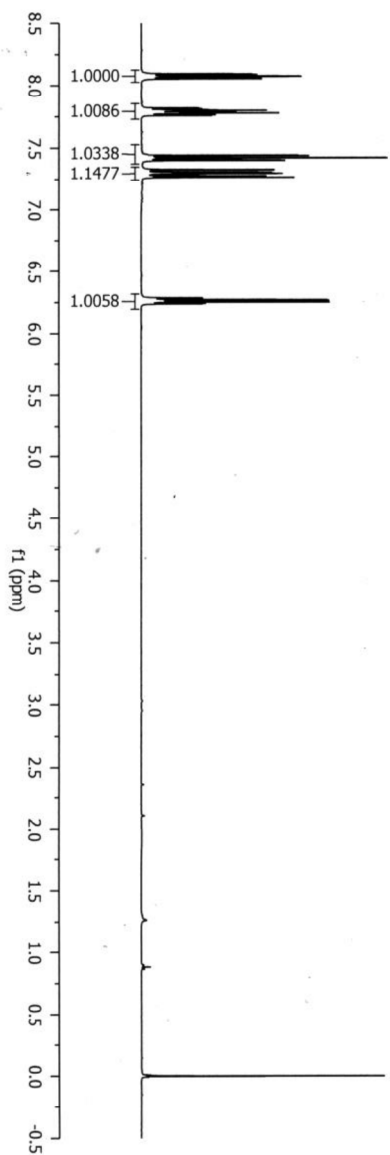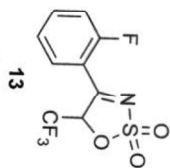

ballison\_930  
ballison\_930 bulk recrystallized material, darker colored sample  
proton.prd CDC13 D:\Ballison 91

Current Data Parameters  
NAME: ballison\_930  
EXPNO: 40  
PROCNO: 1

F2 - Acquisition Parameters  
Date: 20120130  
Time: 10.32  
INSTRUM: nmr400-1  
PROBHD: 5 mm QNP 1H/13  
PULPROG: zg30  
TD: 65536  
SOLVENT: CDCl3  
NS: 8  
DS: 0  
SMH: 8278.1 Hz  
AQ: 3.9584243 sec  
RG: 181  
DW: 60.400 usec  
DE: 6.00 usec  
TE: 294.2 K  
D1: 5.00000000 sec  
TD0: 1 sec

===== CHANNEL f1 =====  
NUC1: 1H  
P1: 9.00 usec  
PL1: 0.00 dB  
SFO1: 400.1324710 MHz

F2 - Processing Parameters  
SI: 0  
SF: 400.1300161 MHz  
FT: Hyper  
Phase: NoPC

Figure S5. <sup>1</sup>H NMR spectrum of 13.

ballison\_937  
ballison\_937 c. 4 and 5 after charcoal  
proton.prd CDCl3 D:\Ballison 81

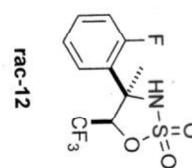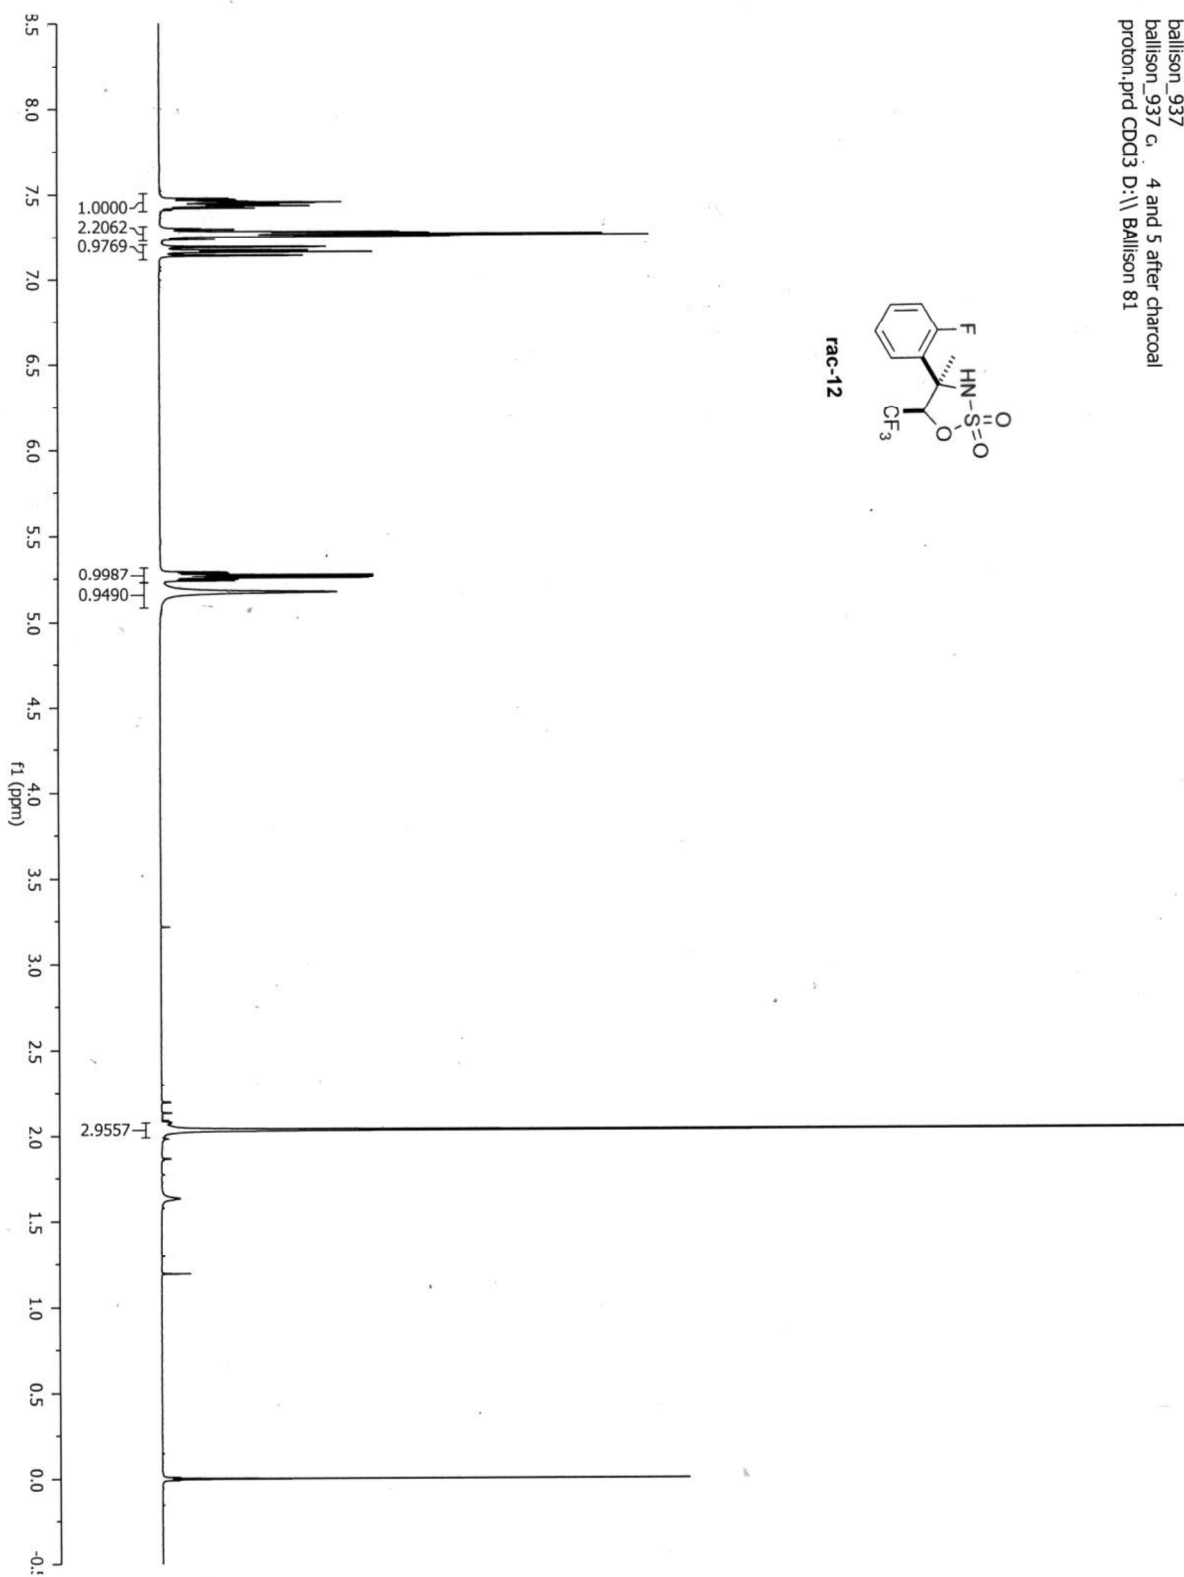

**Figure S6.** <sup>1</sup>H NMR spectrum of **rac-12**.

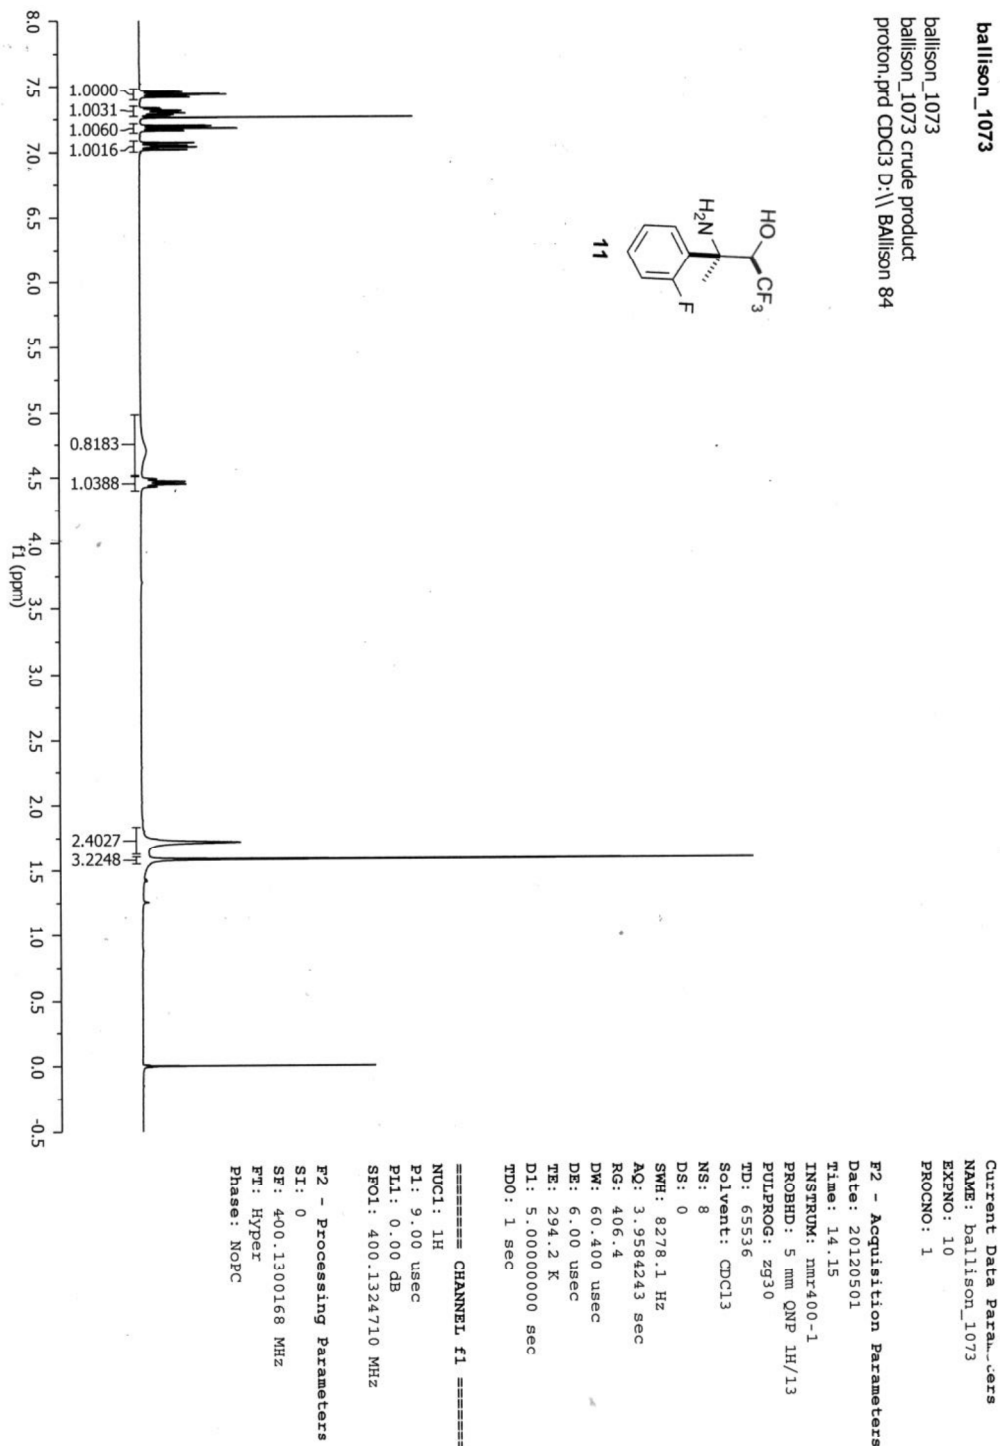

Figure S7. <sup>1</sup>H NMR spectrum of 11.



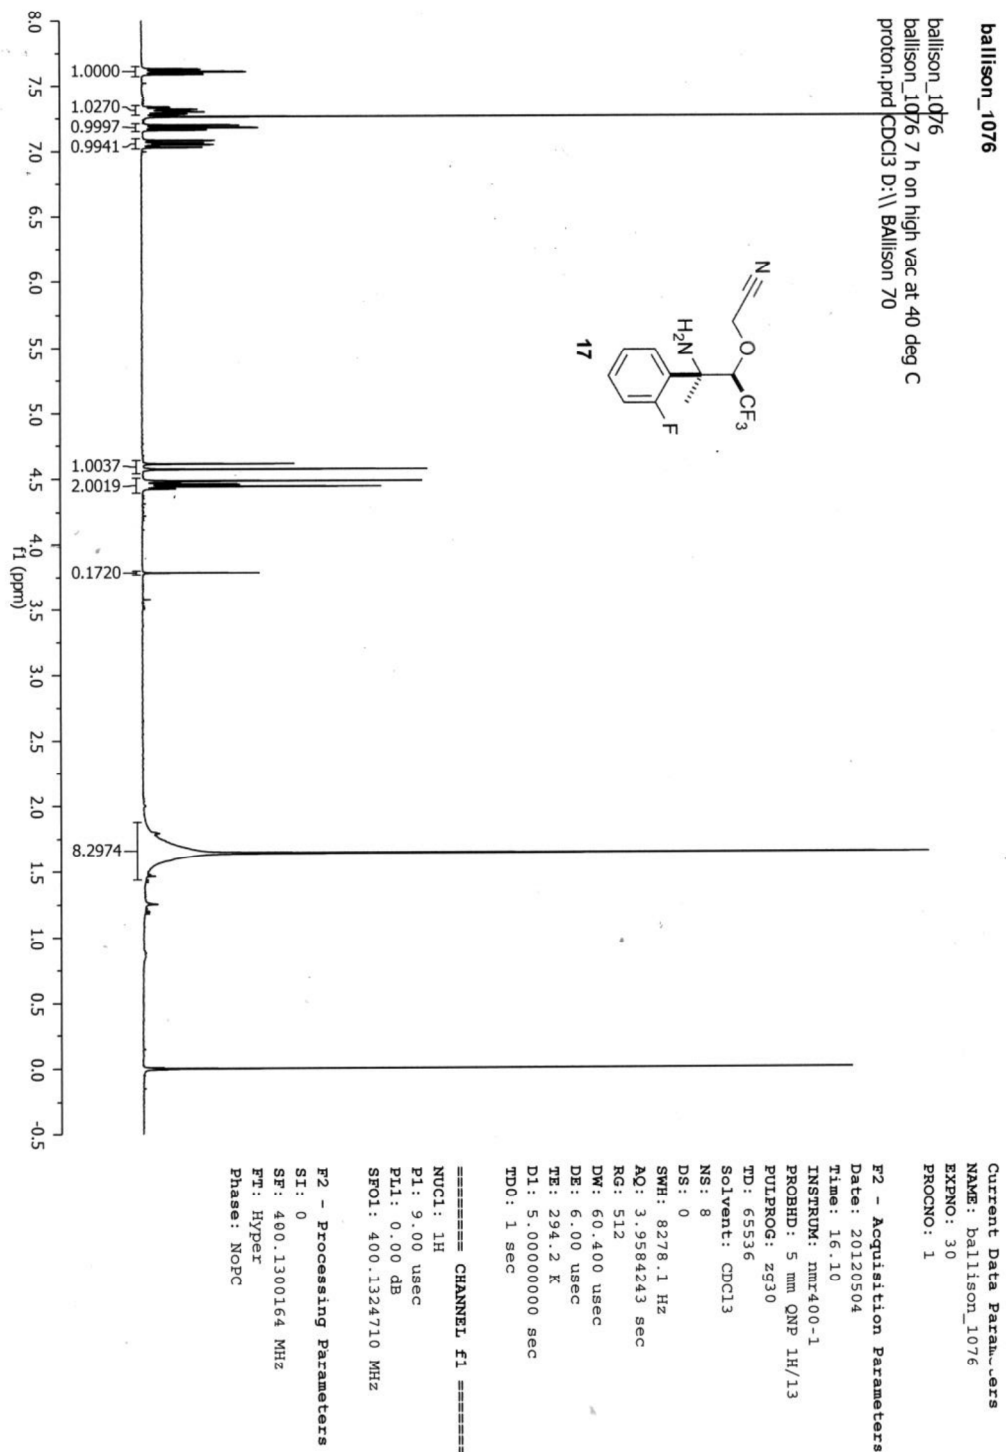

Figure S8. <sup>1</sup>H NMR spectrum of 17.

ballison\_1078

ballison\_1078  
ballison\_1078 crude immediately after conc. from toluene  
proton.prd CDCl3 d: Ballison 9

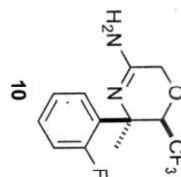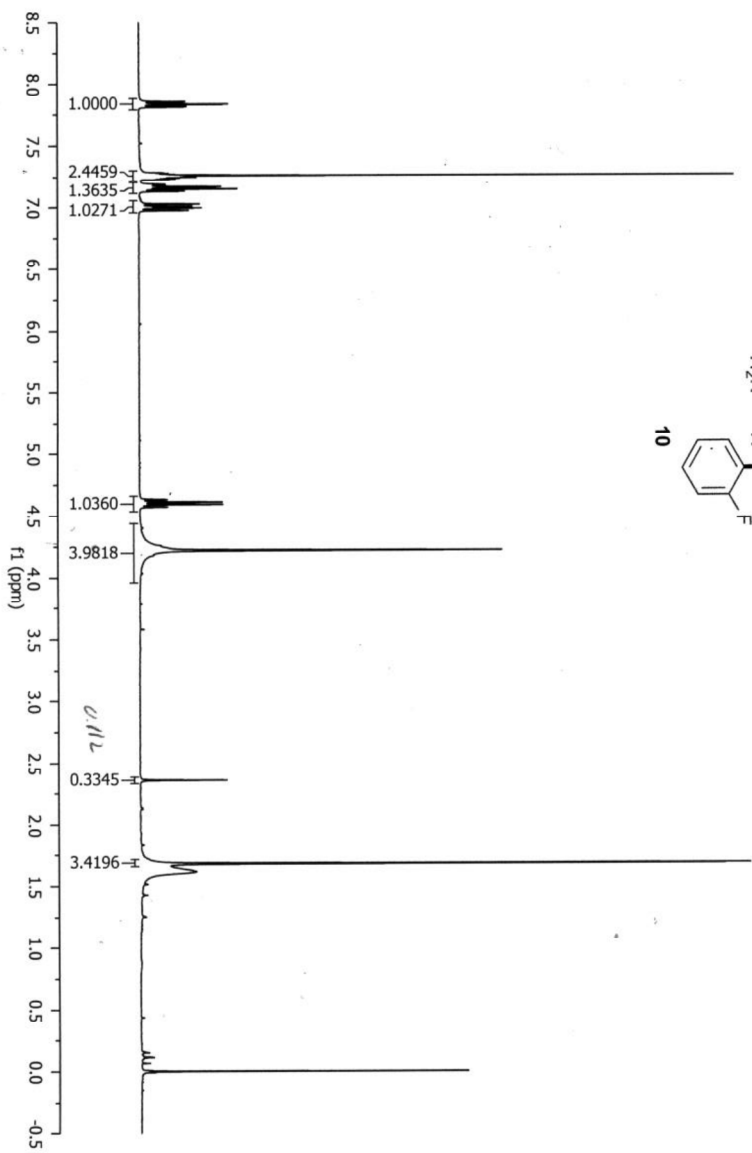

Current Data Parameters  
NAME: ballison\_1078  
EXPNO: 10  
PROCNO: 1

F2 - Acquisition Parameters  
Date: 20120507  
Time: 13.56  
INSTRUM: nmr400-3  
PROBHD: 5 mm QNP 1H/13  
PULPROG: zg30  
TD: 65536  
Solvent: CDCl3  
NS: 16  
DS: 2  
SWH: 8250.8 Hz  
AQ: 3.9715922 sec  
RG: 362  
DM: 60.600 usec  
DE: 6.50 usec  
TE: 295 K  
D1: 5.00000000 sec  
TD0: 1 sec

==== CHANNEL f1 =====  
NUC1: 1H  
P1: 10.20 usec  
PL1: -3.00 dB  
SFO1: 400.1324710 MHz

F2 - Processing Parameters  
SI: 0  
SF: 400.1300087 MHz  
FT: Hyper  
Phase: NOFC

Figure S9. <sup>1</sup>H NMR spectrum of 10.

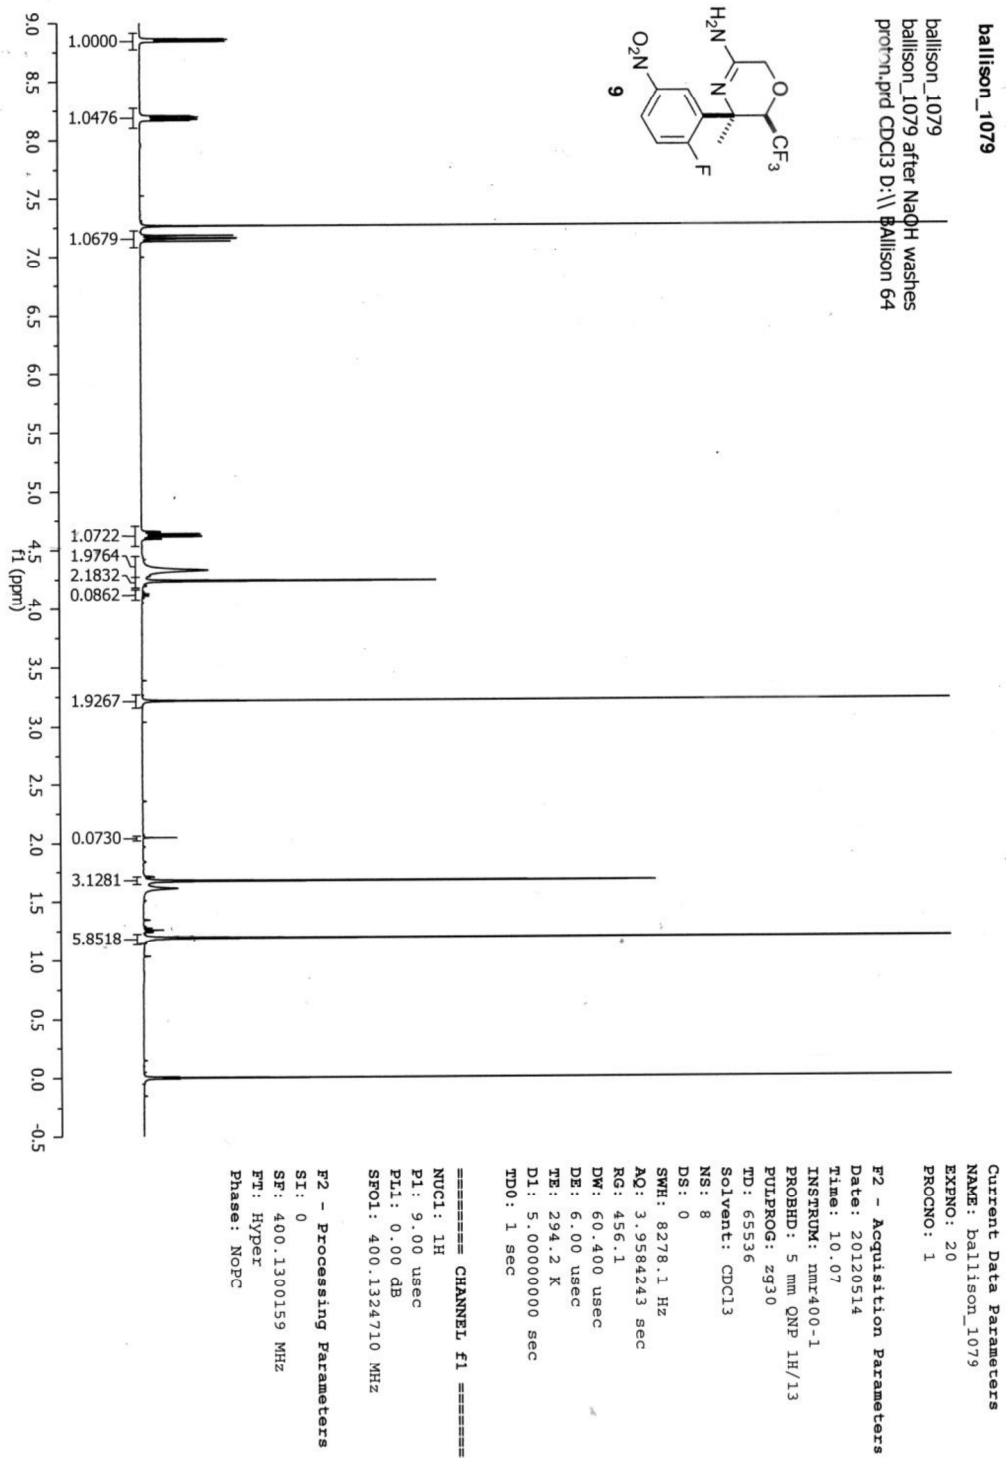

Figure S10. <sup>1</sup>H NMR spectrum of 9.

ballison\_1088

ballison\_1088  
ballison\_1088 flashed product  
proton.prd CDCl3 d: Ballison 17

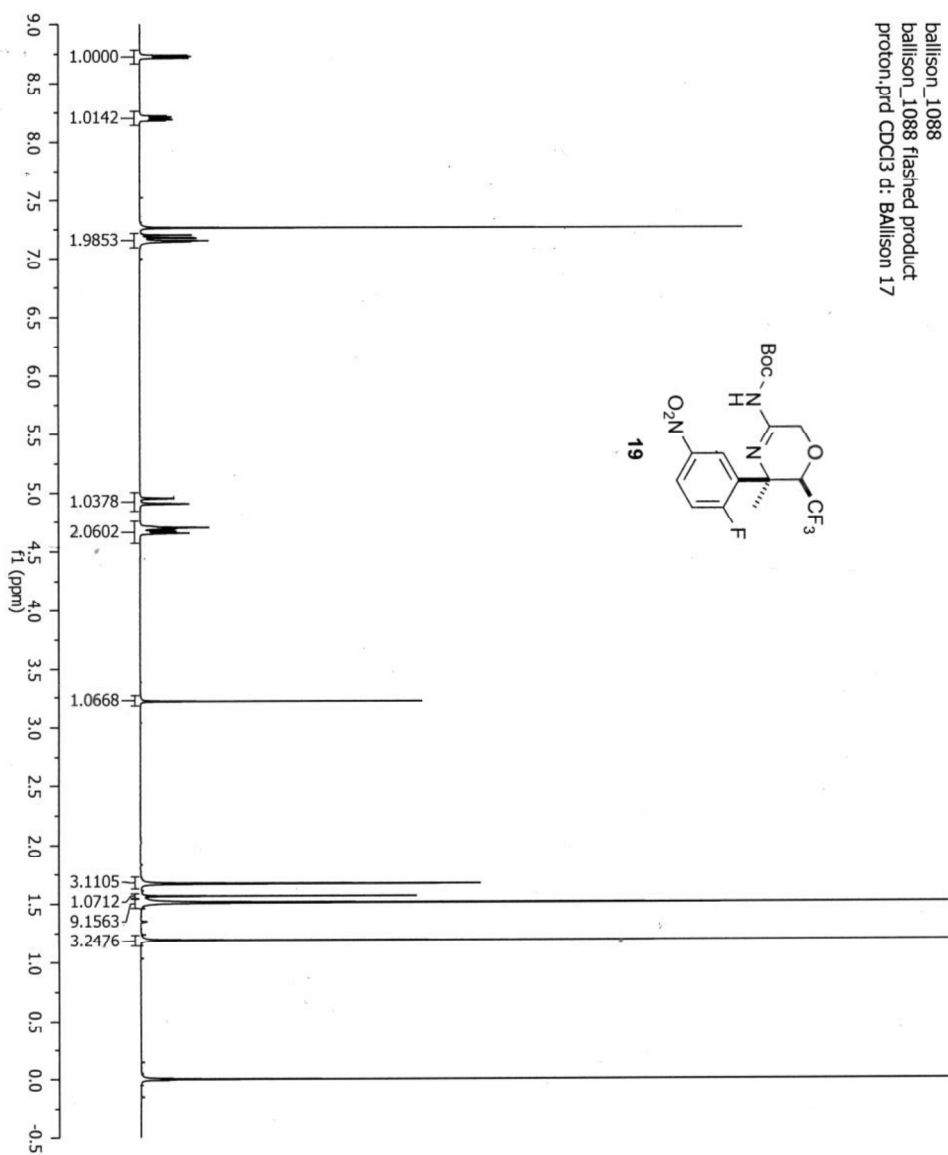

Current Data Parameters  
NAME: ballison\_1088  
EXPNO: 10  
PROCNO: 1

F2 - Acquisition Parameters

Date: 20120515  
Time: 22.17  
INSTRUM: nmr400-3  
PROBHD: 5 mm QNP 1H/13  
PULPROG: zg30  
TD: 65536  
Solvent: CDCl3  
NS: 16  
DS: 2  
SWH: 8250.8 Hz  
AQ: 3.9715922 sec  
RG: 322.5  
DM: 60.600 usec  
DE: 6.50 usec  
TE: 294.7 K  
D1: 5.00000000 sec  
TD0: 1 sec

===== CHANNEL f1 =====

NUC1: 1H  
PI: 10.20 usec  
PL1: -3.00 dB  
SF01: 400.1324710 MHz

F2 - Processing Parameters

SI: 0  
SF: 400.1300084 MHz  
FR: Hyper  
Phase: NoPC

Figure S11. <sup>1</sup>H NMR spectrum of 19.

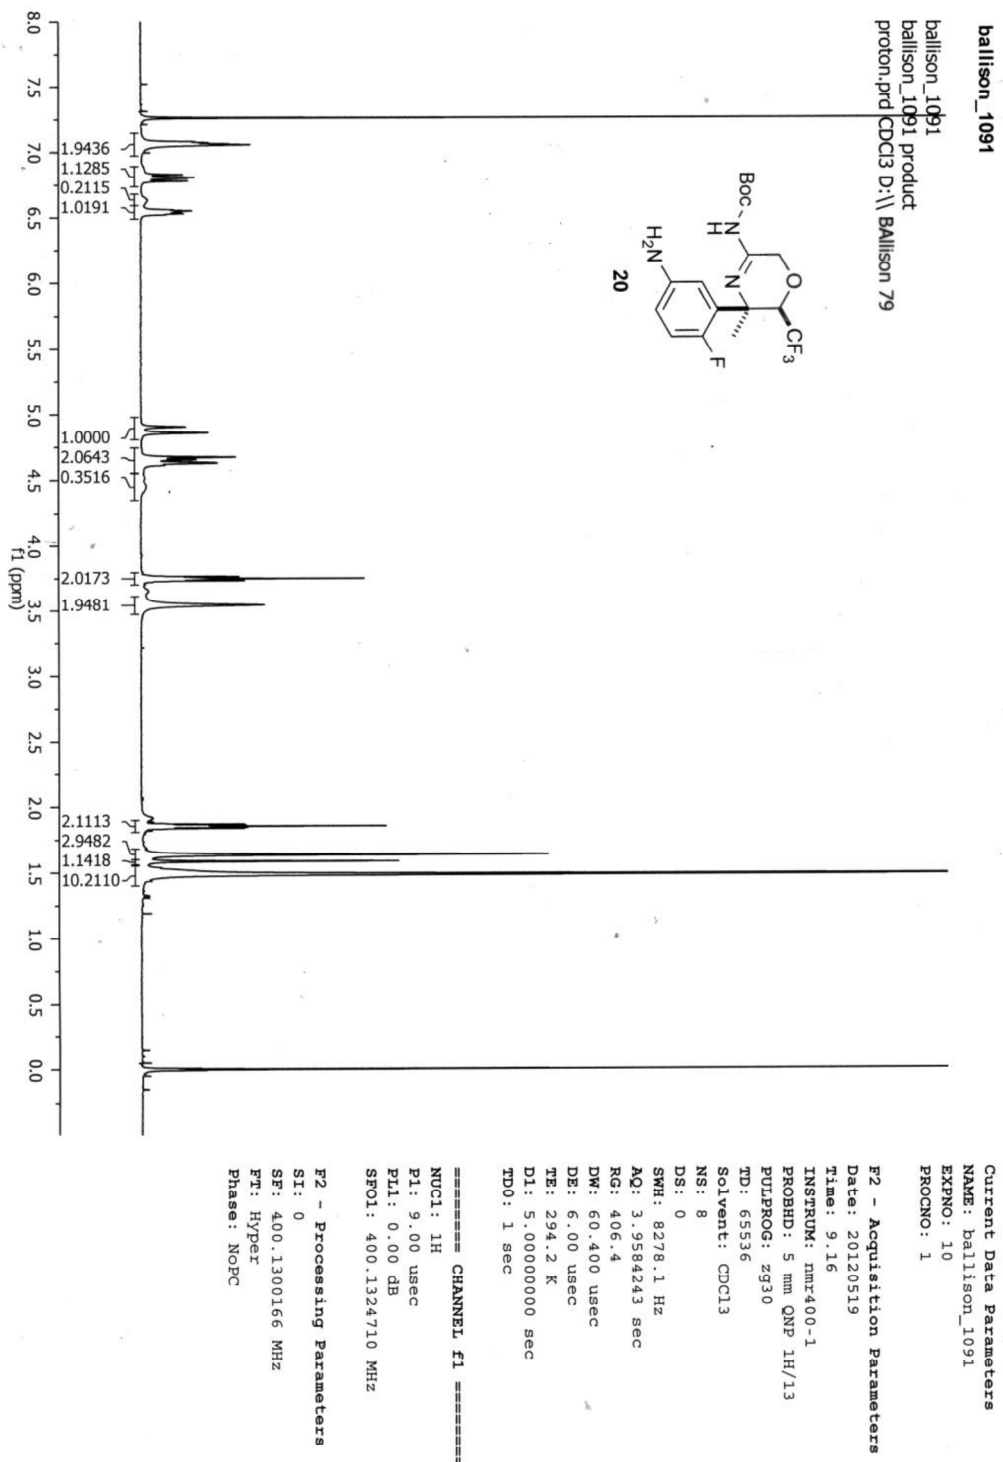

Figure S12. <sup>1</sup>H NMR spectrum of 20.

ballison\_1094

ballison\_1094  
ballison\_1094 crude solid on hi vac for 2 h  
proton,prd CDCl3 D:\\Ballison 80

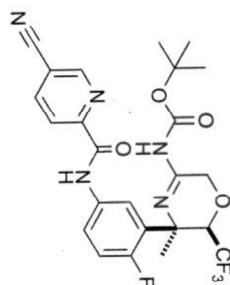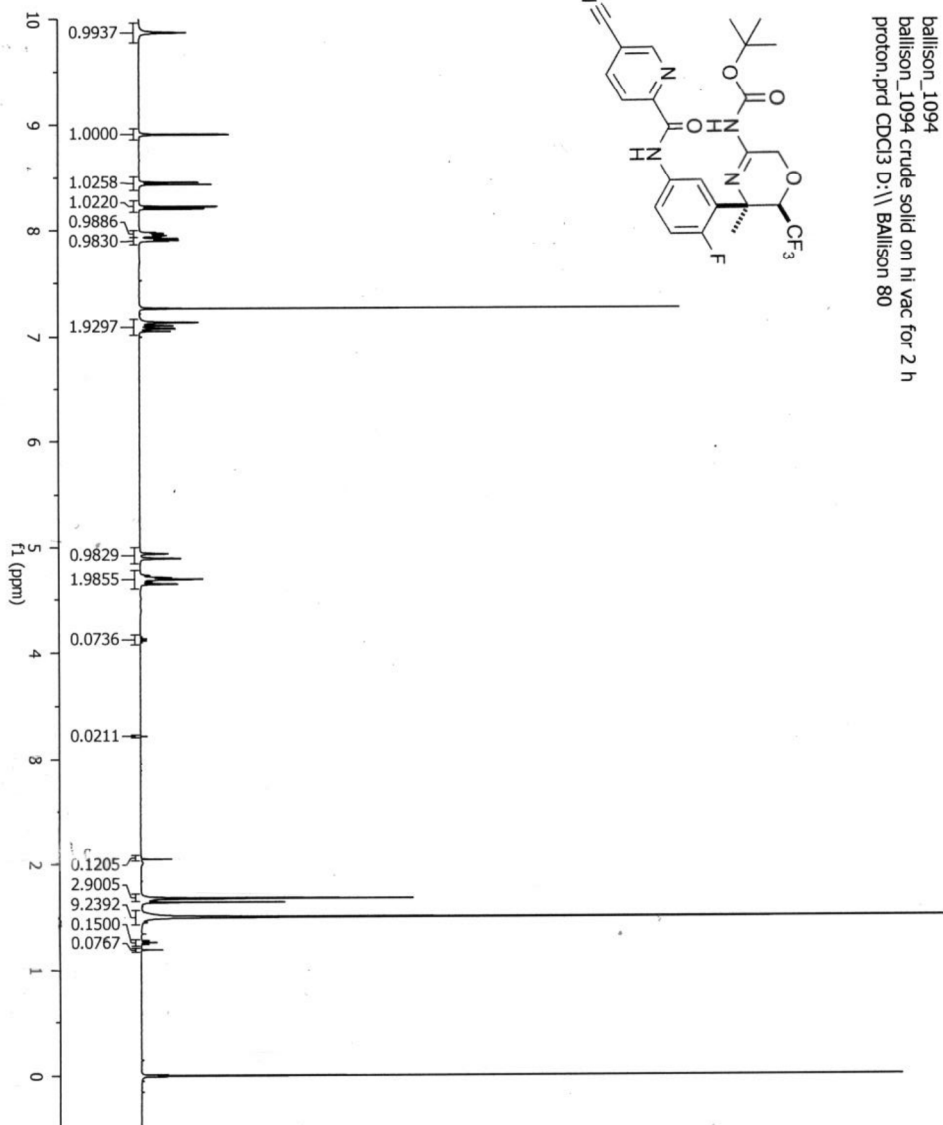

Current Data Parameters  
NAME: ballison\_1094  
EXPNO: 10  
PROCNO: 1

F2 - Acquisition Parameters

Date: 20120520  
Time: 3.35  
INSTRUM: nmr400-1  
PROBHD: 5 mm QNP 1H/13  
PULPROG: zg30  
TD: 65536  
Solvent: CDCl3  
NS: 8  
DS: 0  
SWH: 8278.1 Hz  
AQ: 3.9584243 sec  
RG: 406.4  
DW: 60.400 usec  
DE: 6.00 usec  
TE: 294.2 K  
D1: 5.00000000 sec  
TD0: 1 sec

===== CHANNEL f1 =====

NUC1: 1H  
P1: 9.00 usec  
PL1: 0.00 dB  
SF01: 400.1324710 MHz

F2 - Processing Parameters

SI: 0  
SF: 400.1300161 MHz  
FT: Hyper  
Phase: NOBC

Figure S13. <sup>1</sup>H NMR spectrum of Boc-protected 1.

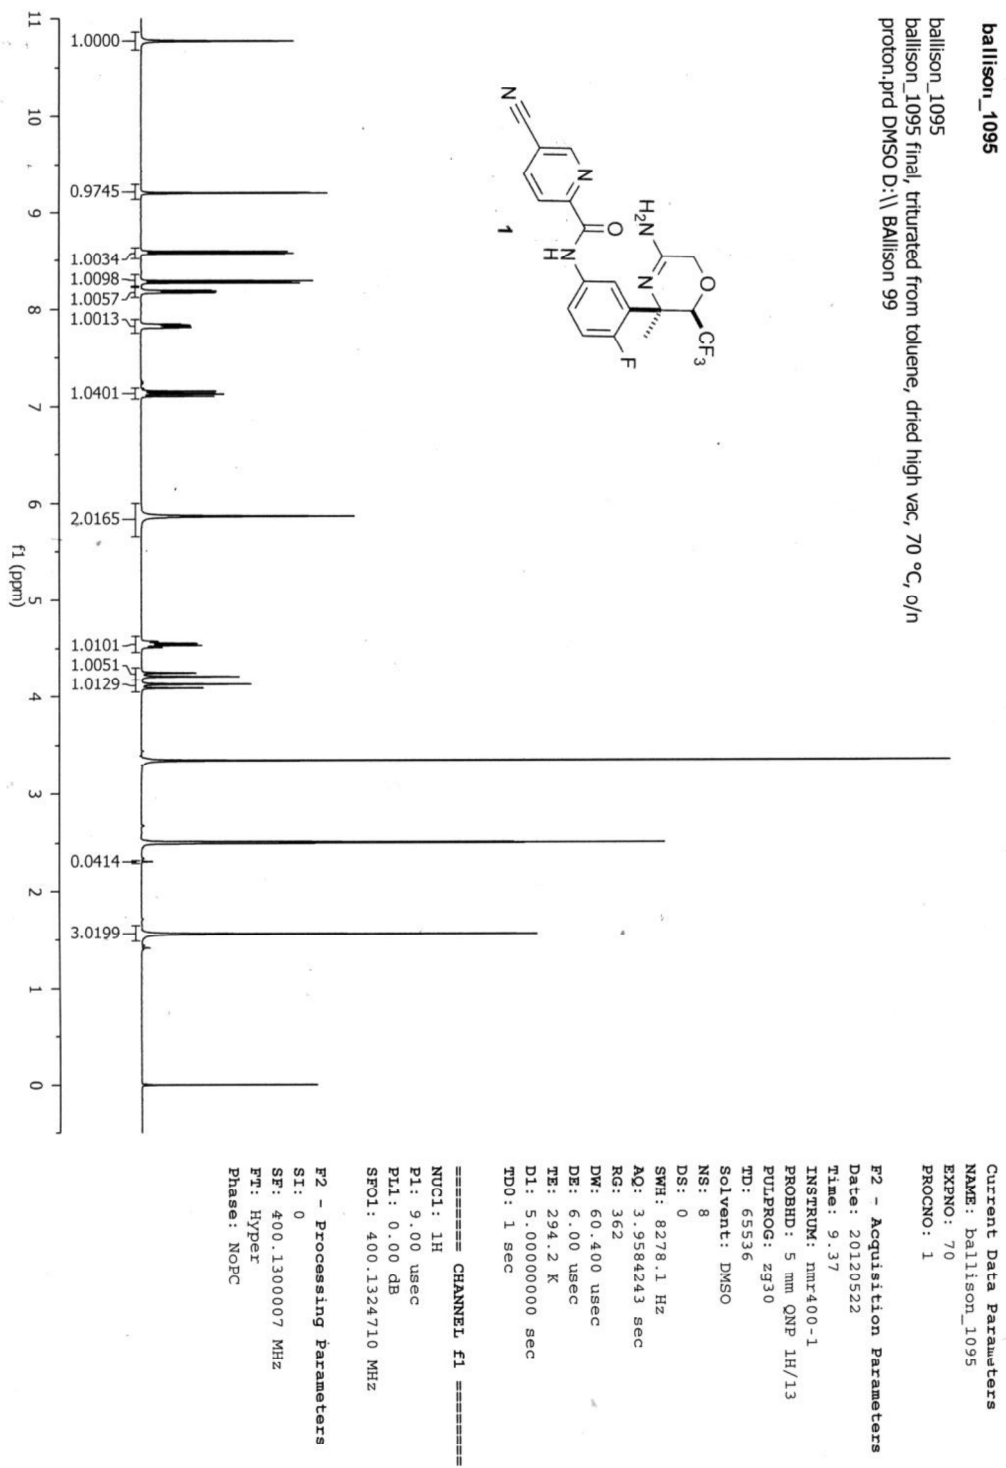

Figure S14. <sup>1</sup>H NMR spectrum of 1.

ballison\_930.20.1.1r  
ballison\_930  
c13cpd.prd CDCl3 d: BALLISON 12

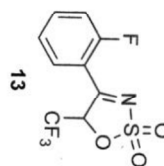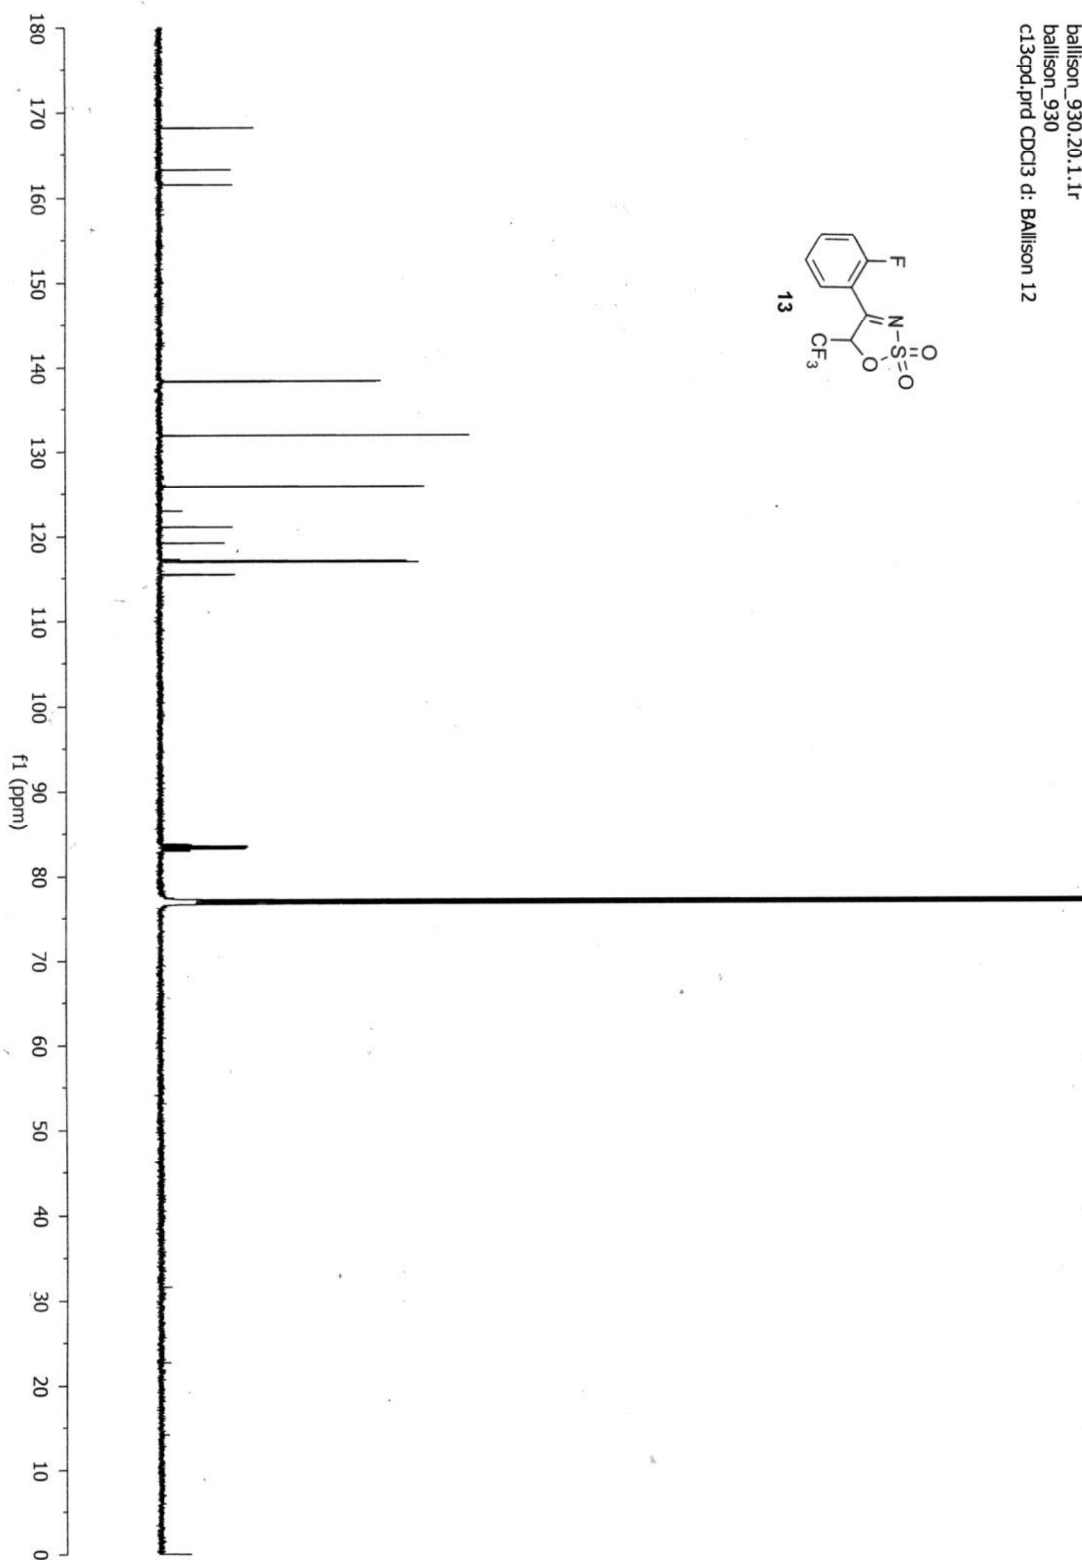

Figure S15.  $^{13}\text{C}$  NMR spectrum of 13.



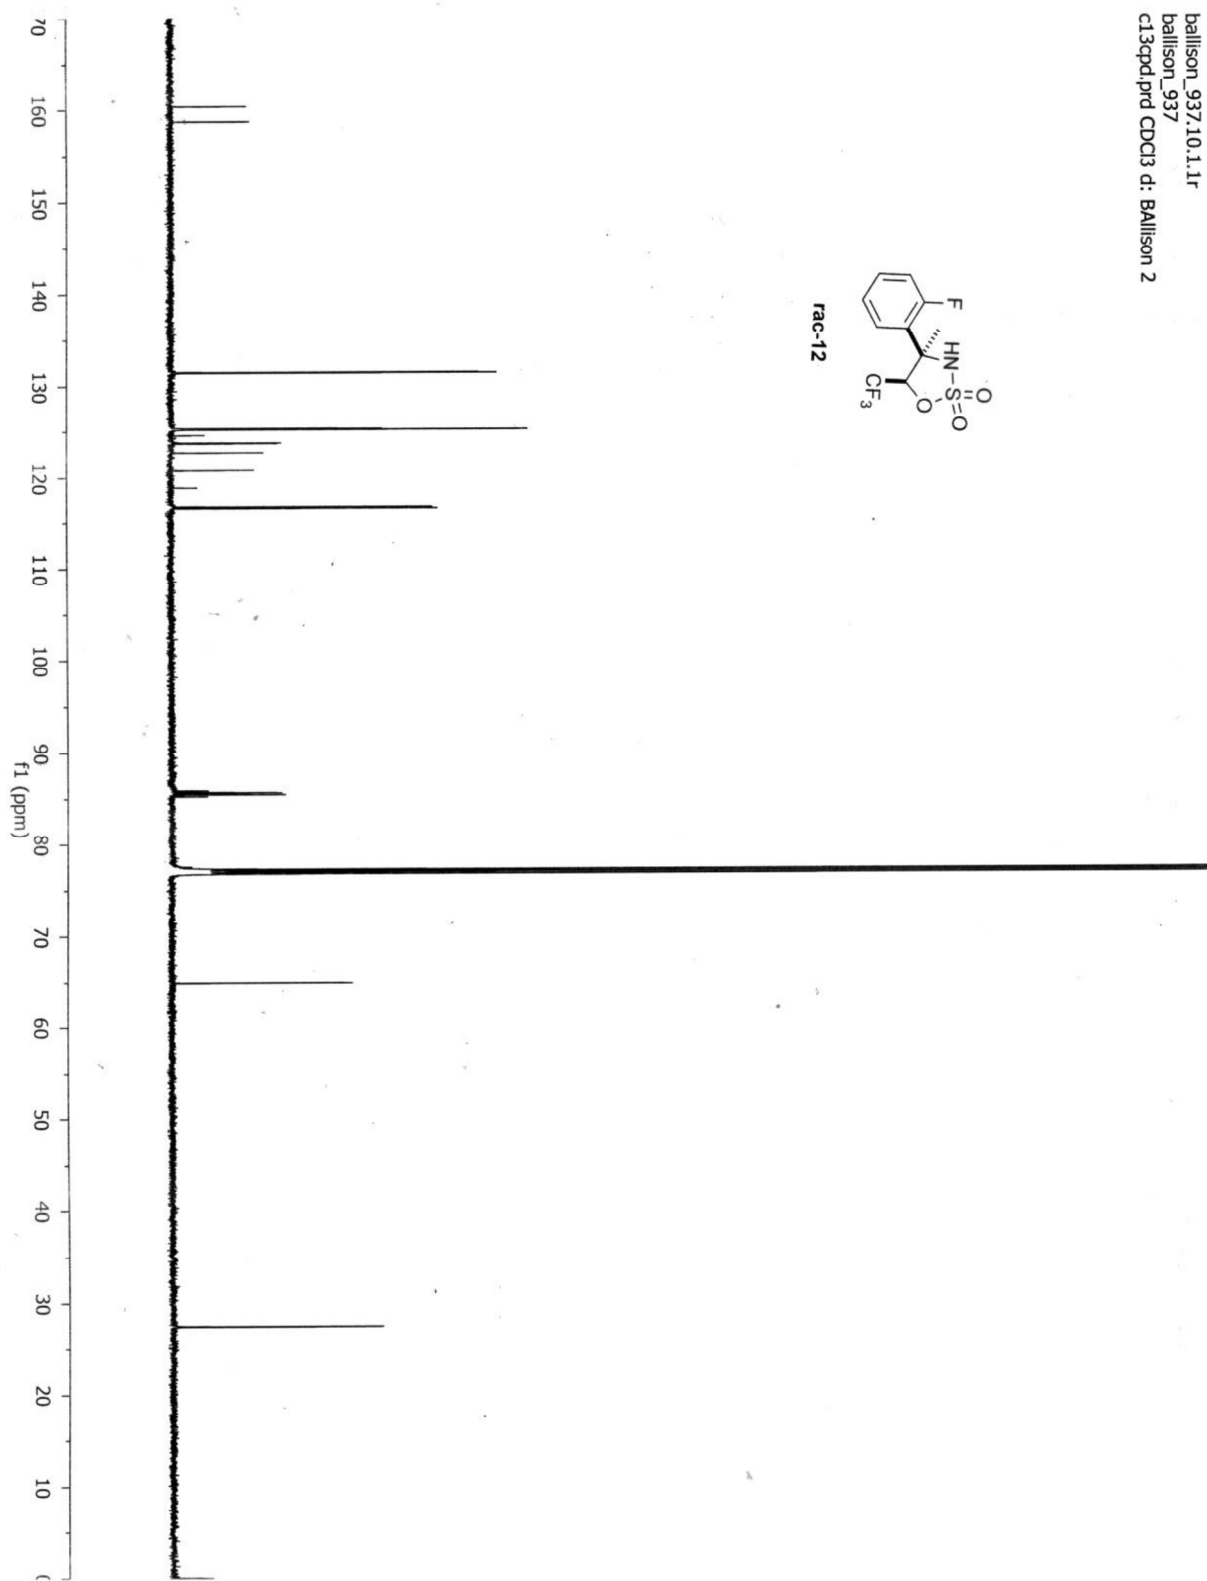

Figure S16. <sup>13</sup>C NMR spectrum of **rac-12**.

ballison\_1073.10.1.1f  
ballison\_1073  
c13cpd.prd CDCl3 d: BALLISON 4

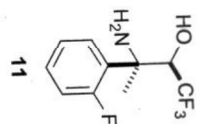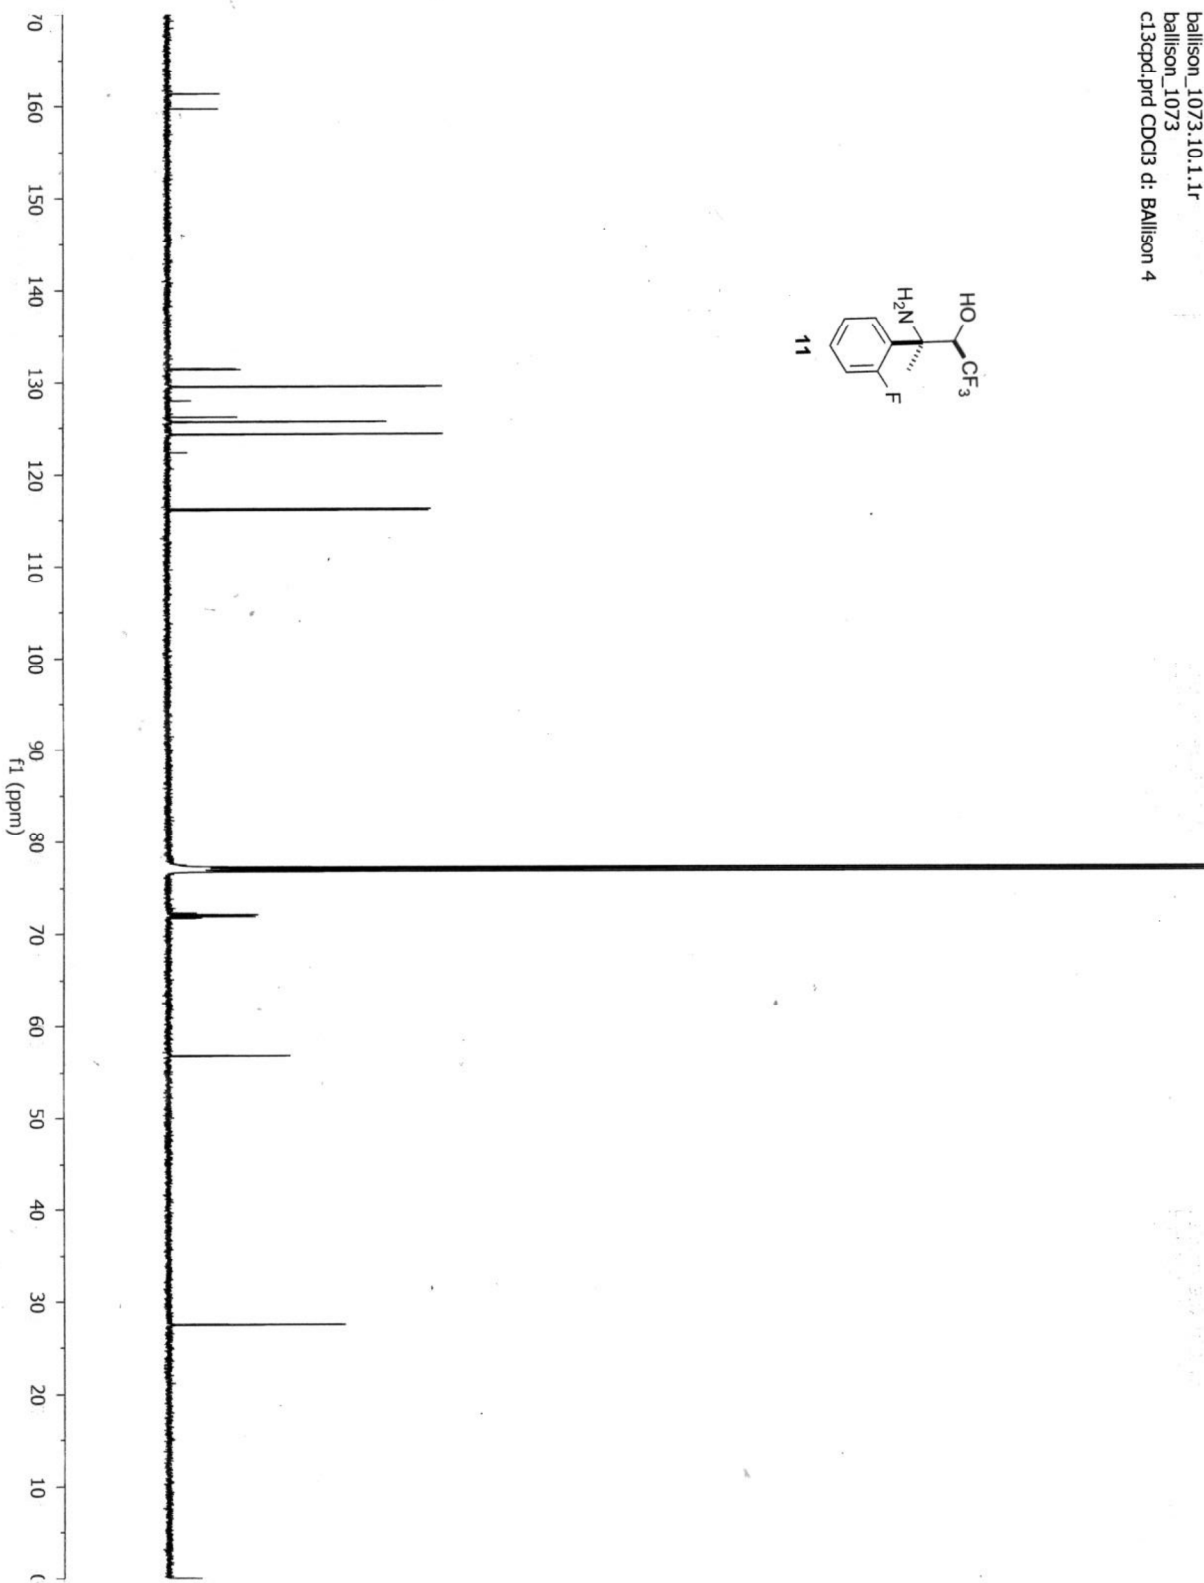

Figure S17. <sup>13</sup>C NMR spectrum of 11.

ballison\_1076.10.1.1f  
ballison\_1076  
c13cpd.prd CDCl3 d: BALLISON 11

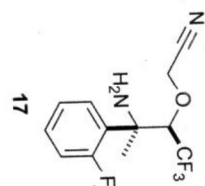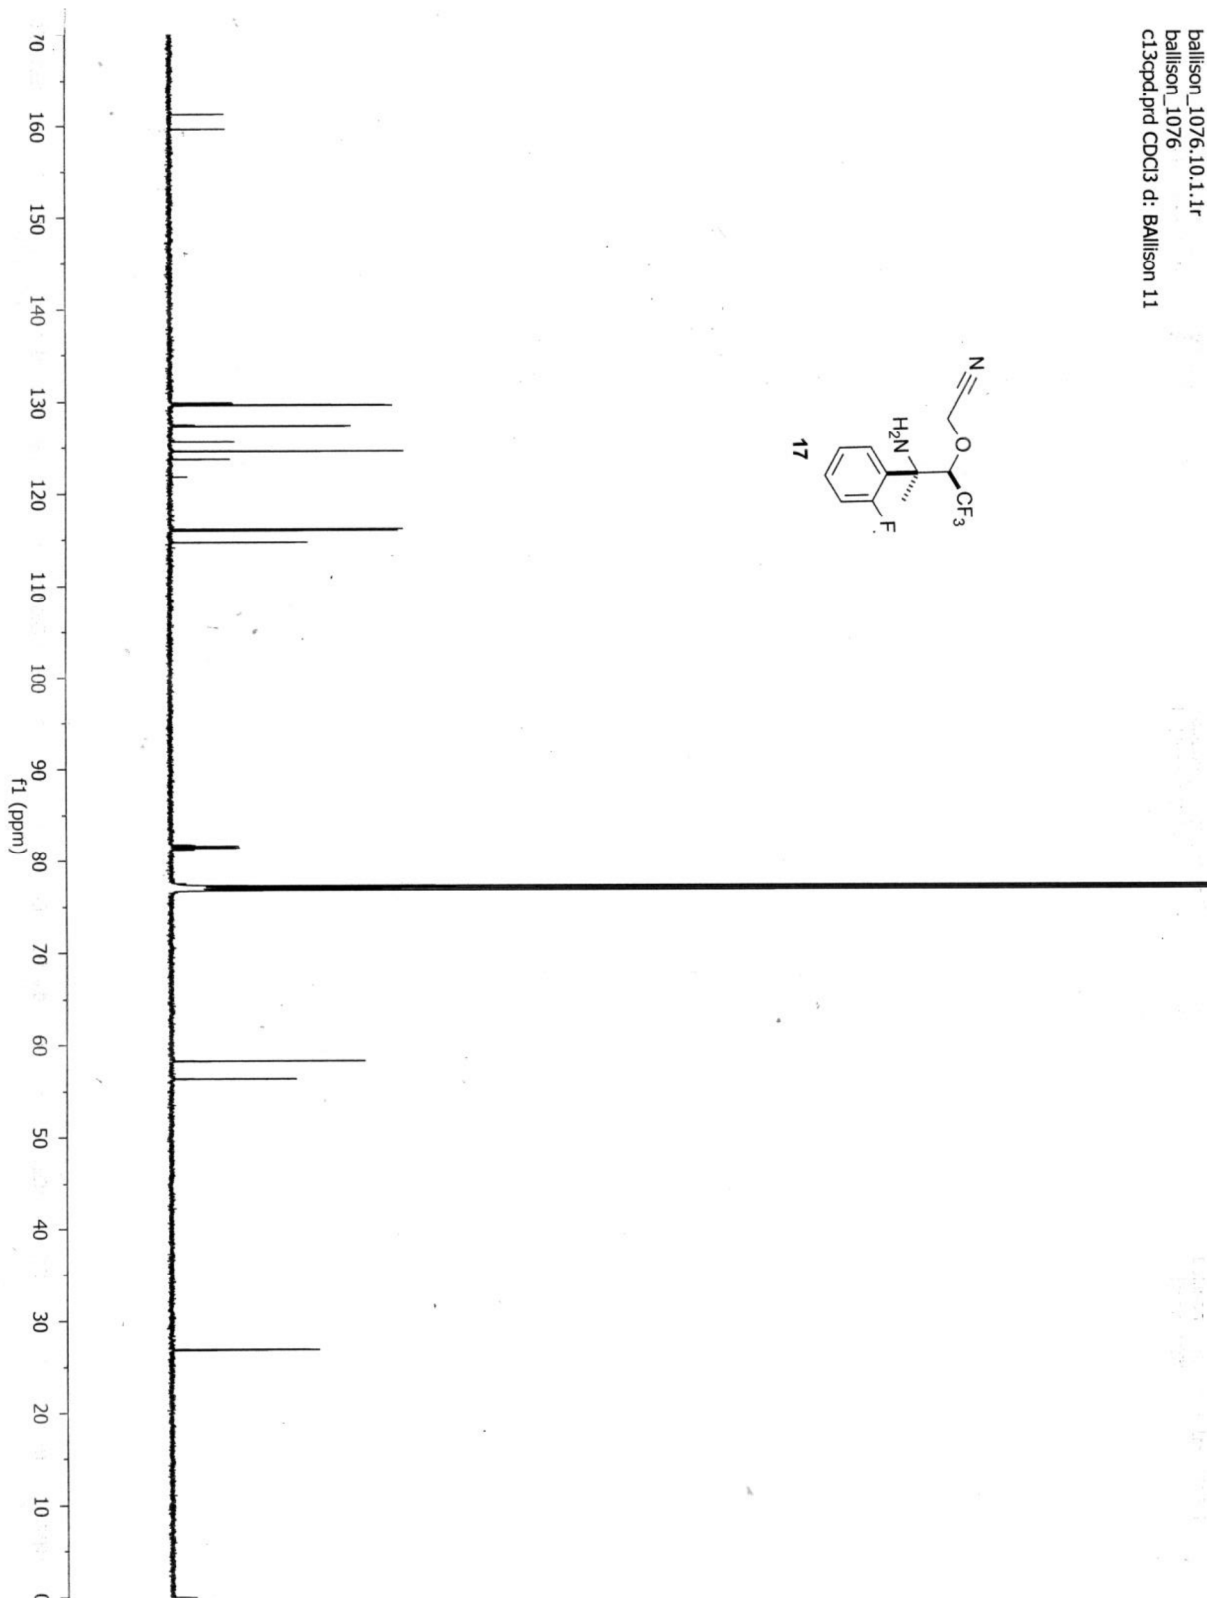

Figure S18. <sup>13</sup>C NMR spectrum of 17.

ballison\_1078.10.1.1f  
ballison\_1078  
c13cpd.prd CDCl3 d: BALLISON 9

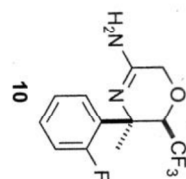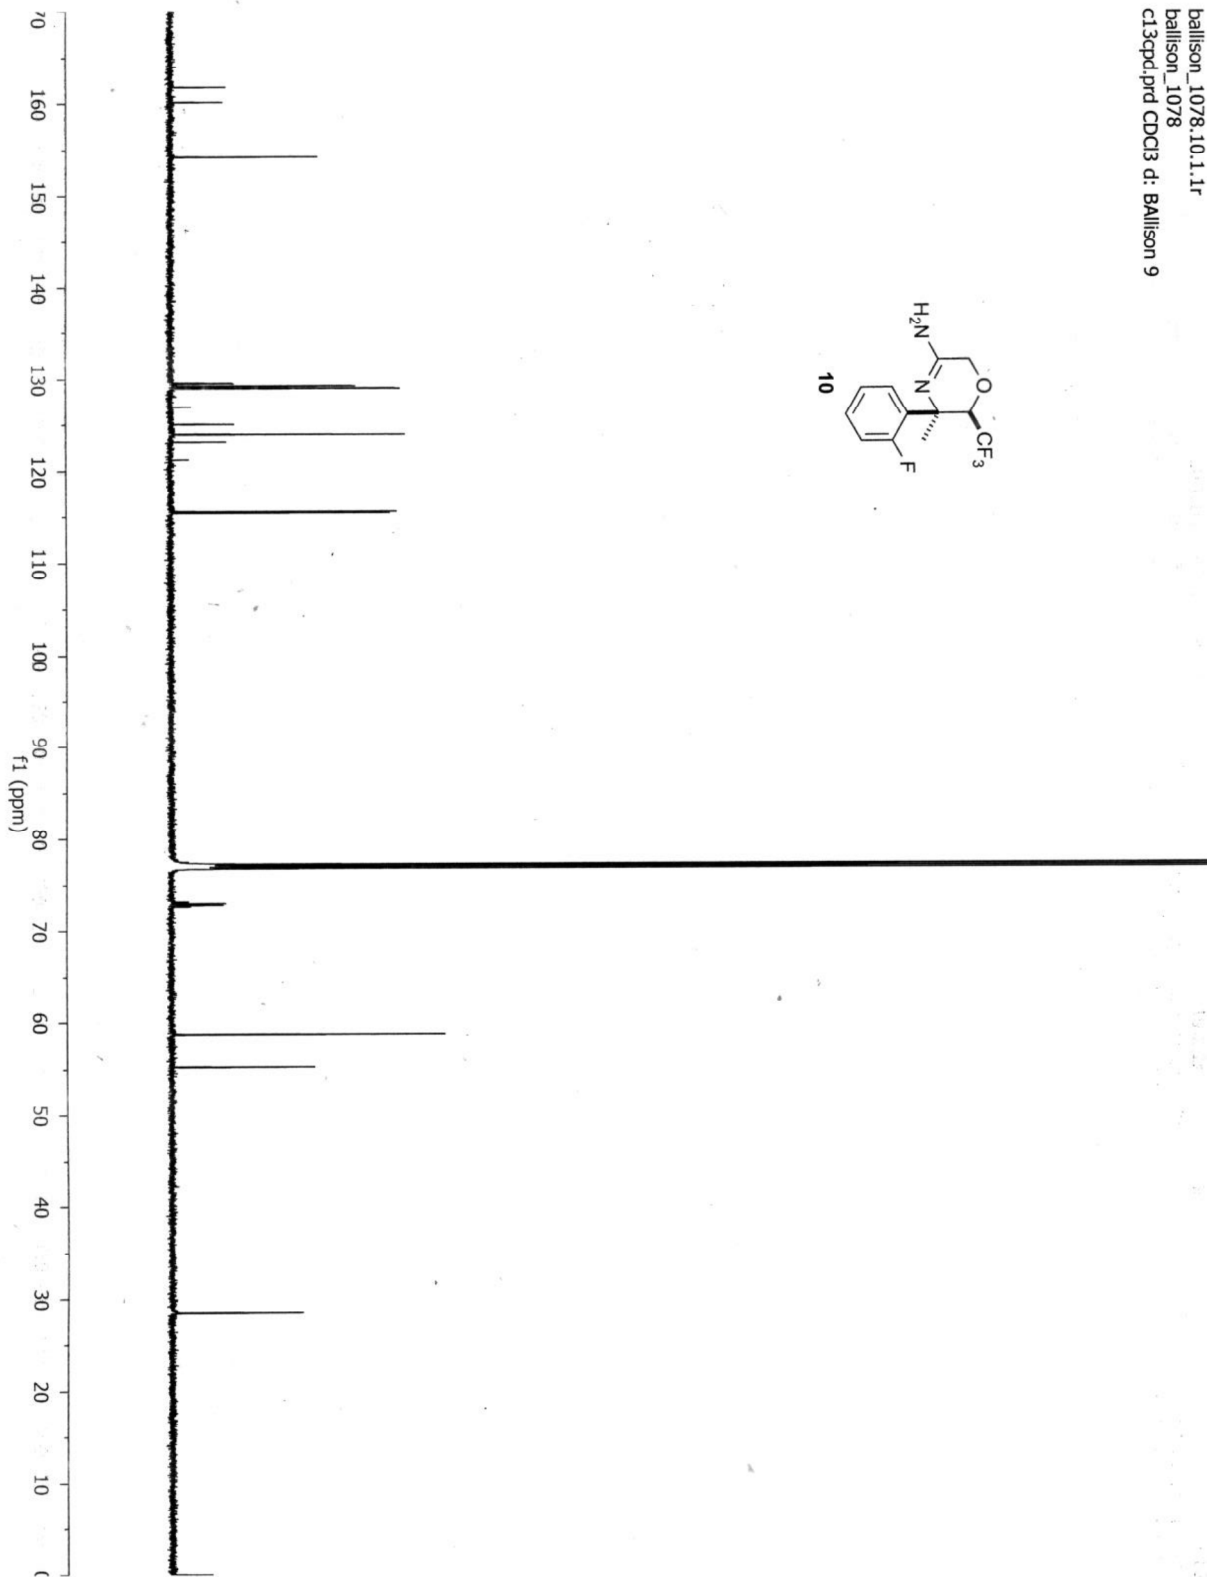

Figure S19. <sup>13</sup>C NMR spectrum of 10.

ballison\_1079.10.1.1r  
ballison\_1079  
c13cpd.prd CDCl3 d: Ballison 6

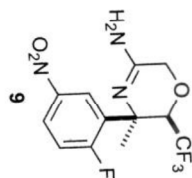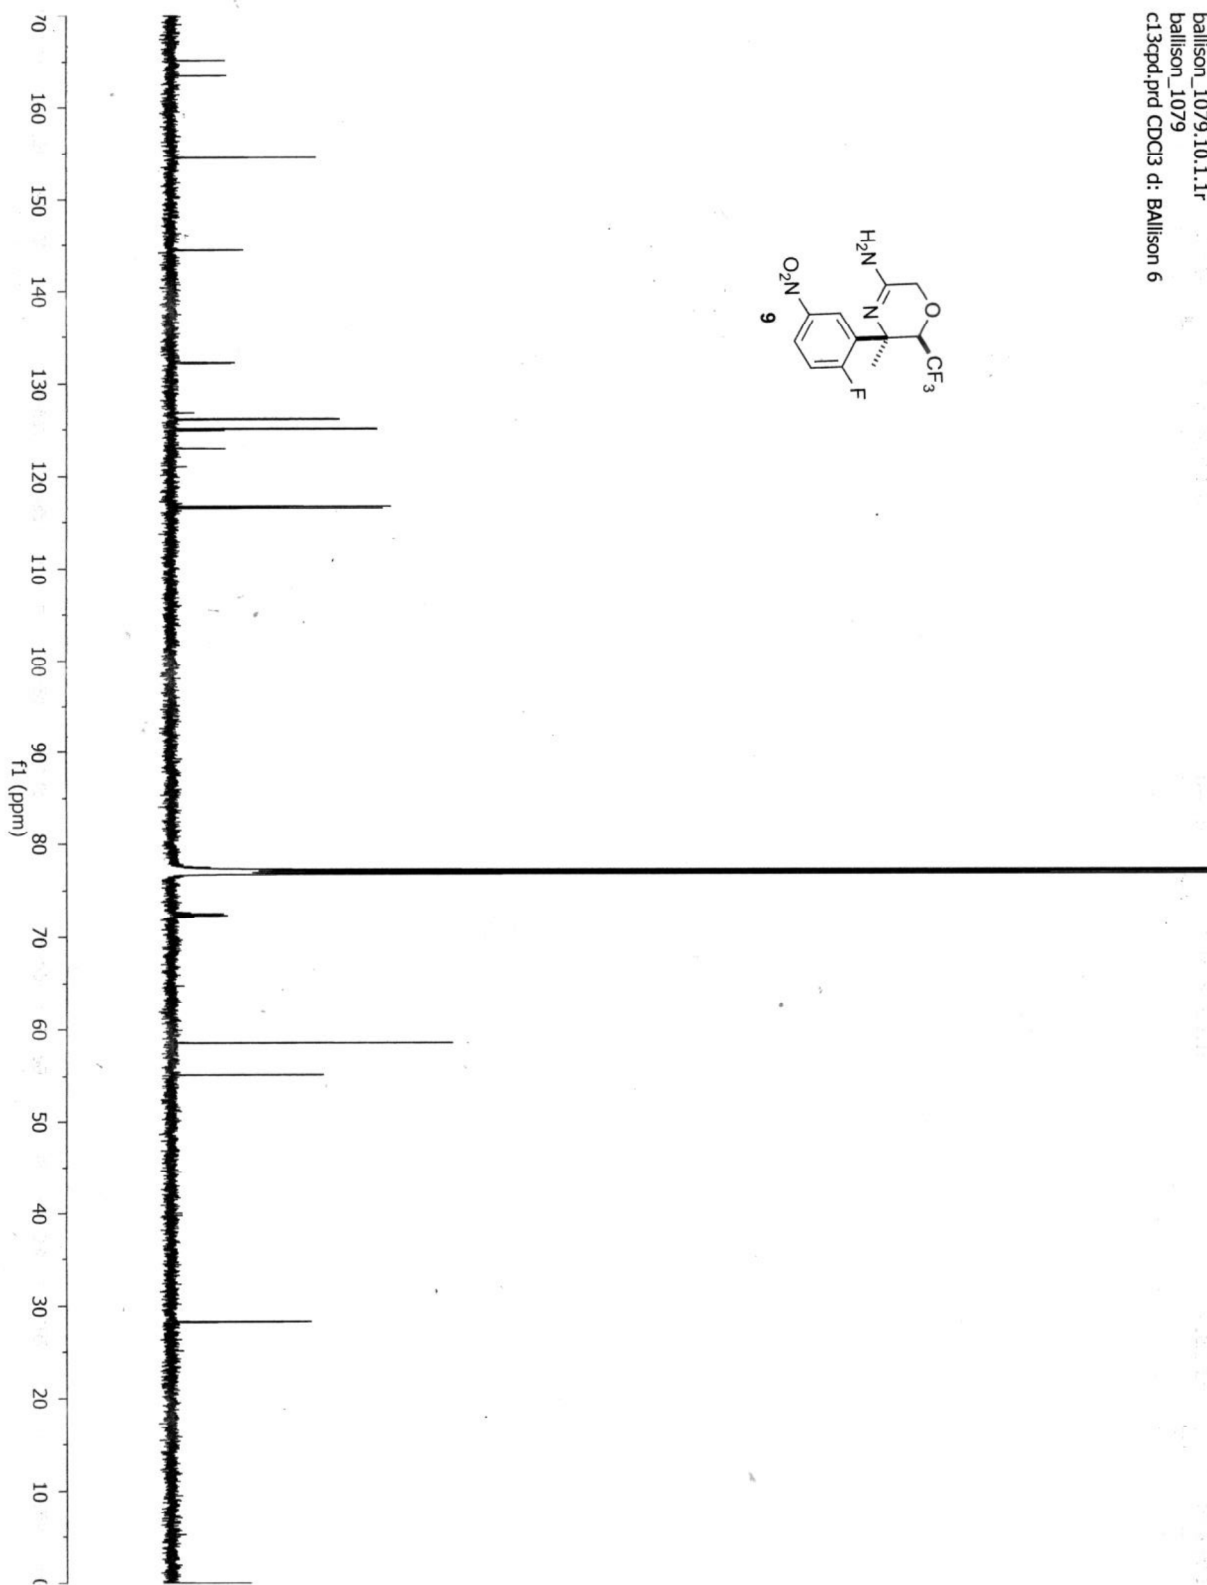

Figure S20. <sup>13</sup>C NMR spectrum of 9.

ballison\_1088.10.1.1r  
ballison\_1088  
c13cpd.prd CDCl3 d: BALLISON 5

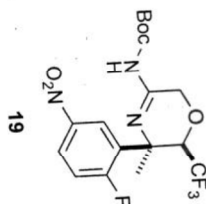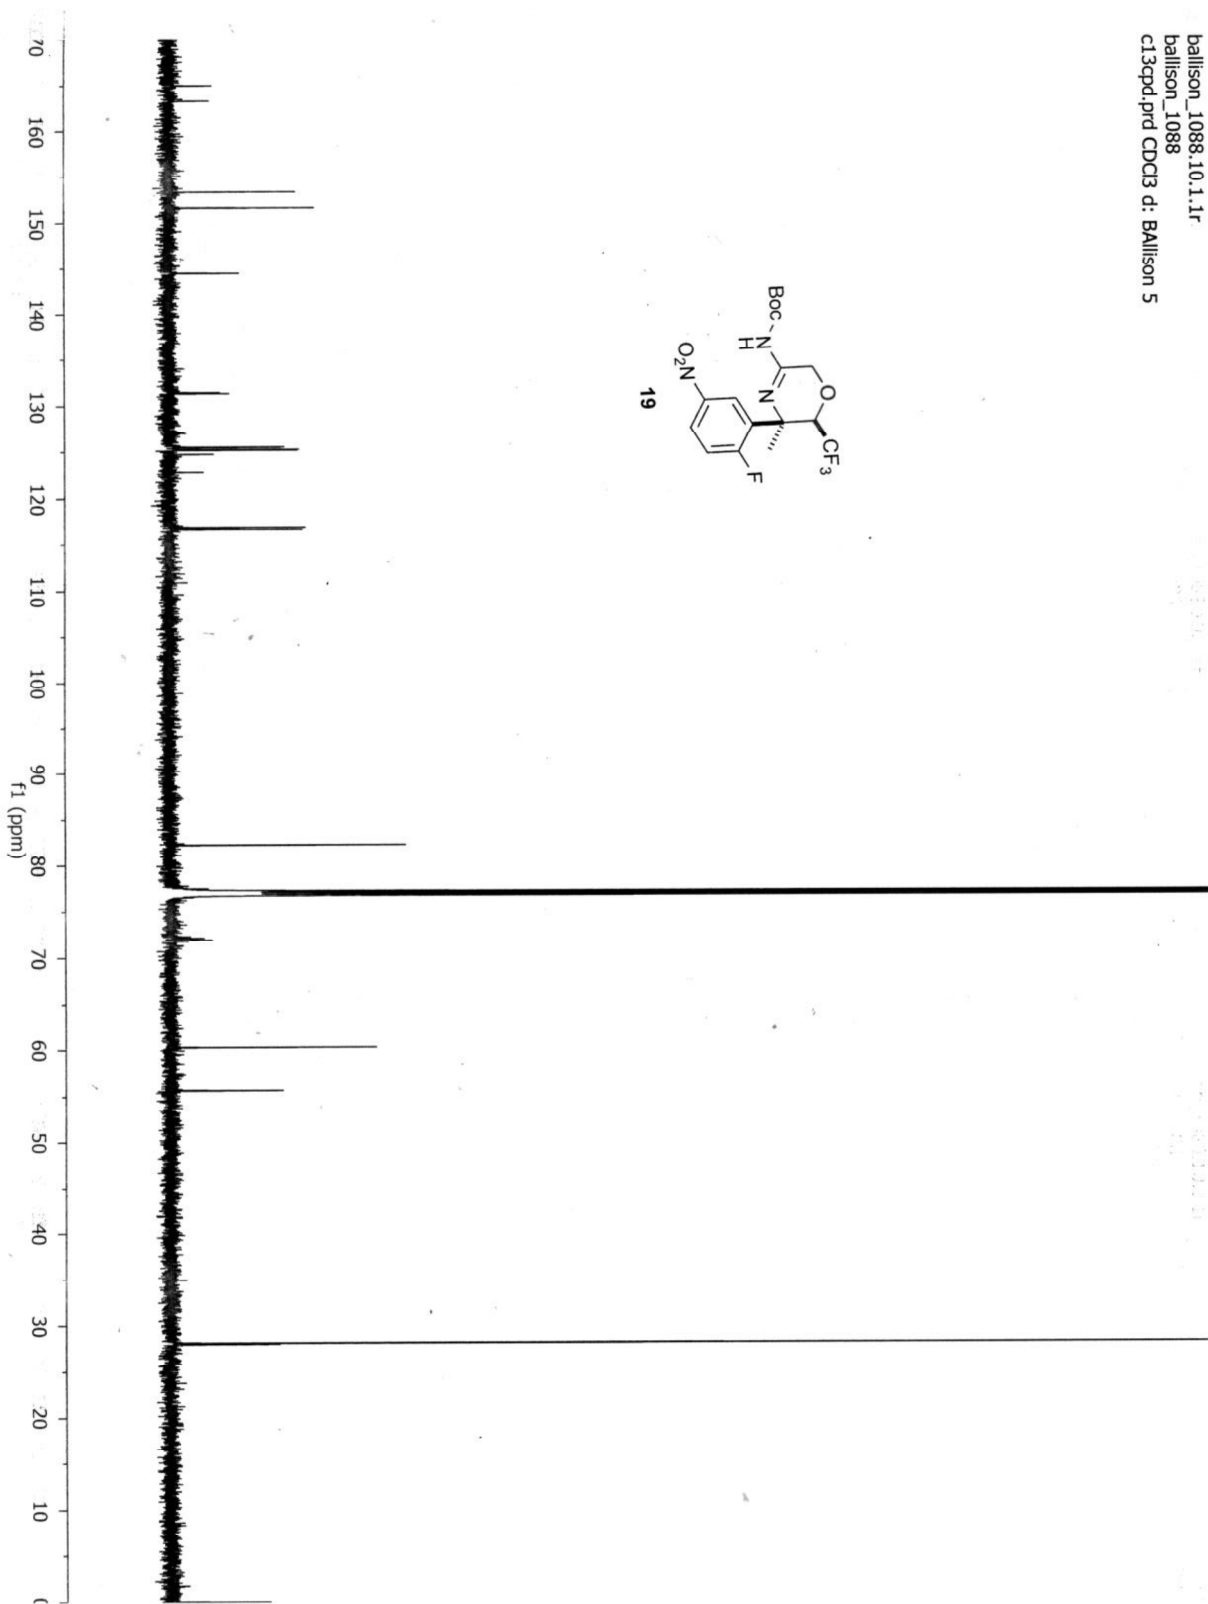

Figure S21.  $^{13}\text{C}$  NMR spectrum of 19.

ballison\_1090.20.1.1r  
ballison\_1090  
c13cpd.prd CDCl3 d: BALLISON 13

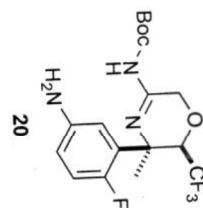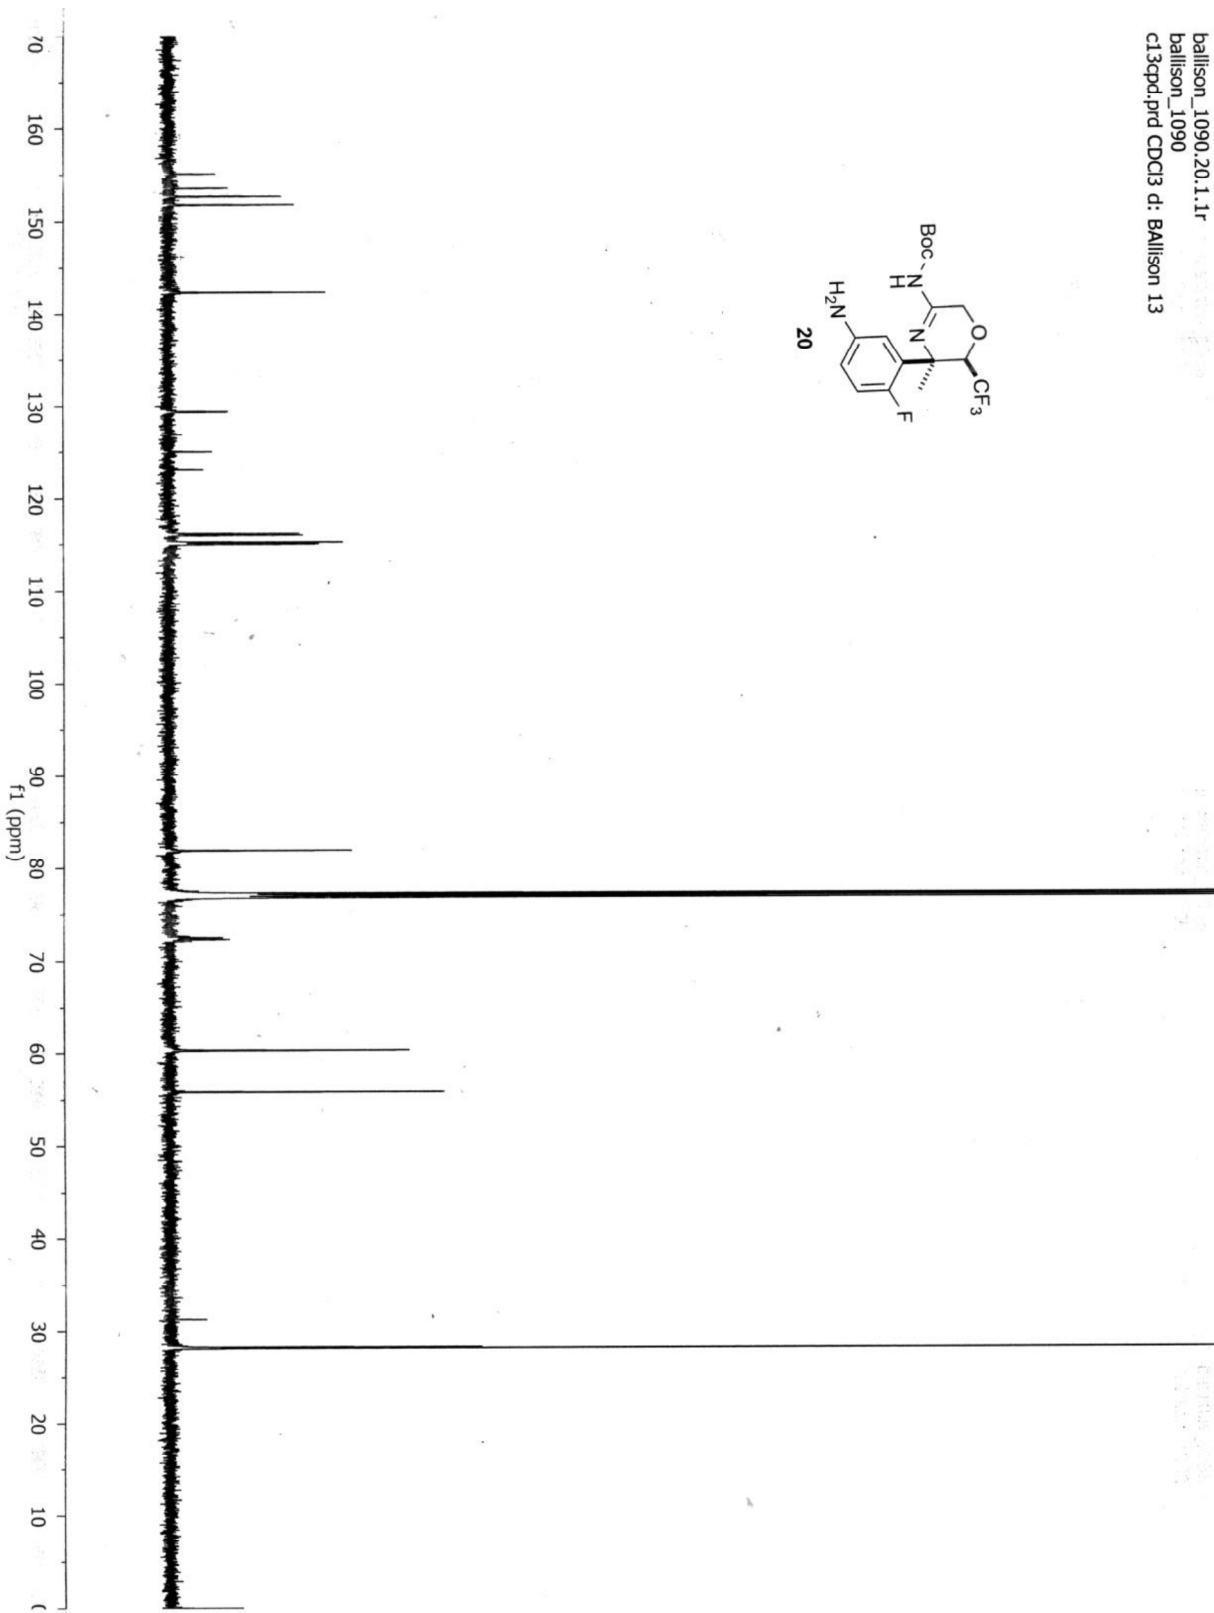

Figure S22.  $^{13}\text{C}$  NMR spectrum of 20.

ballison\_1094.10.1.1r  
ballison\_1094  
C13cpd.prd CDC13 d: BALLISON 8

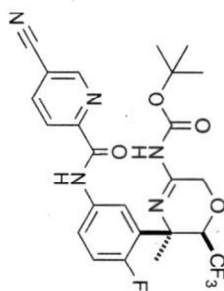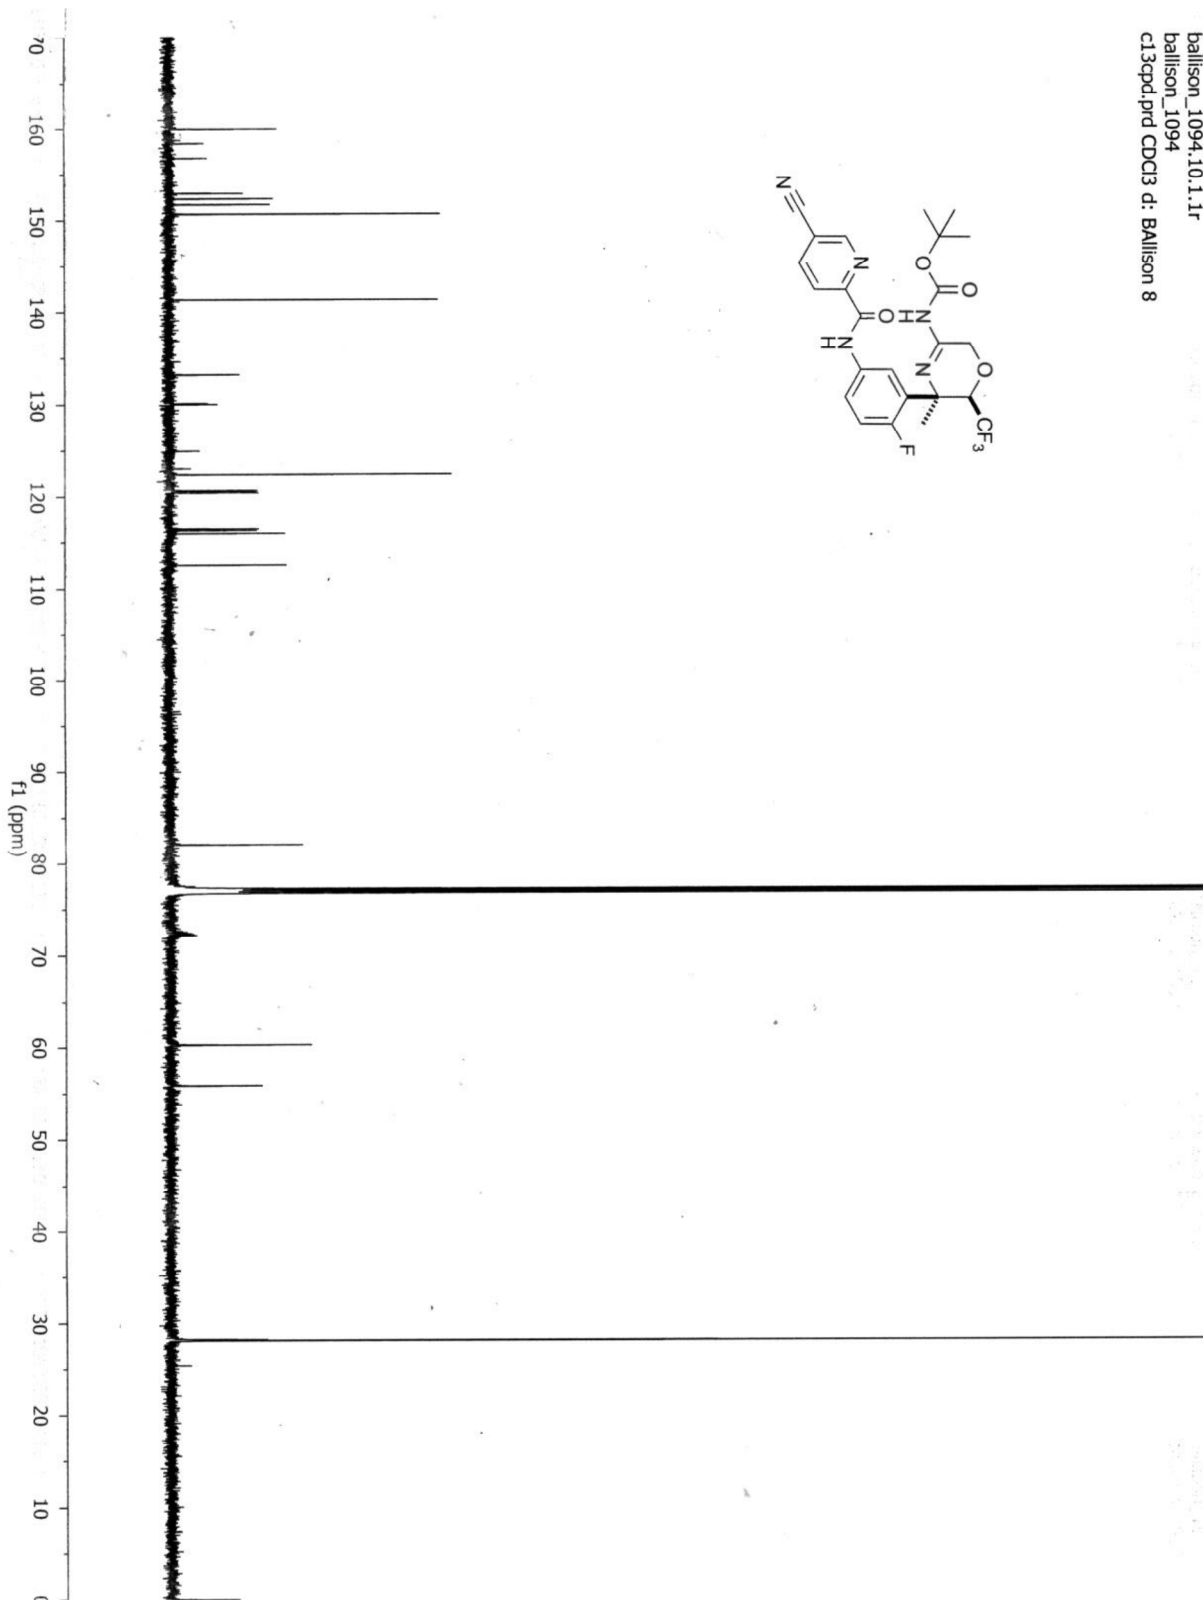

Figure S23.  $^{13}\text{C}$  NMR spectrum of Boc-protected 1.



ballison\_1095.10.1.1r  
ballison\_1095  
c13cpd.prd CDCl3 d: Ballison 7

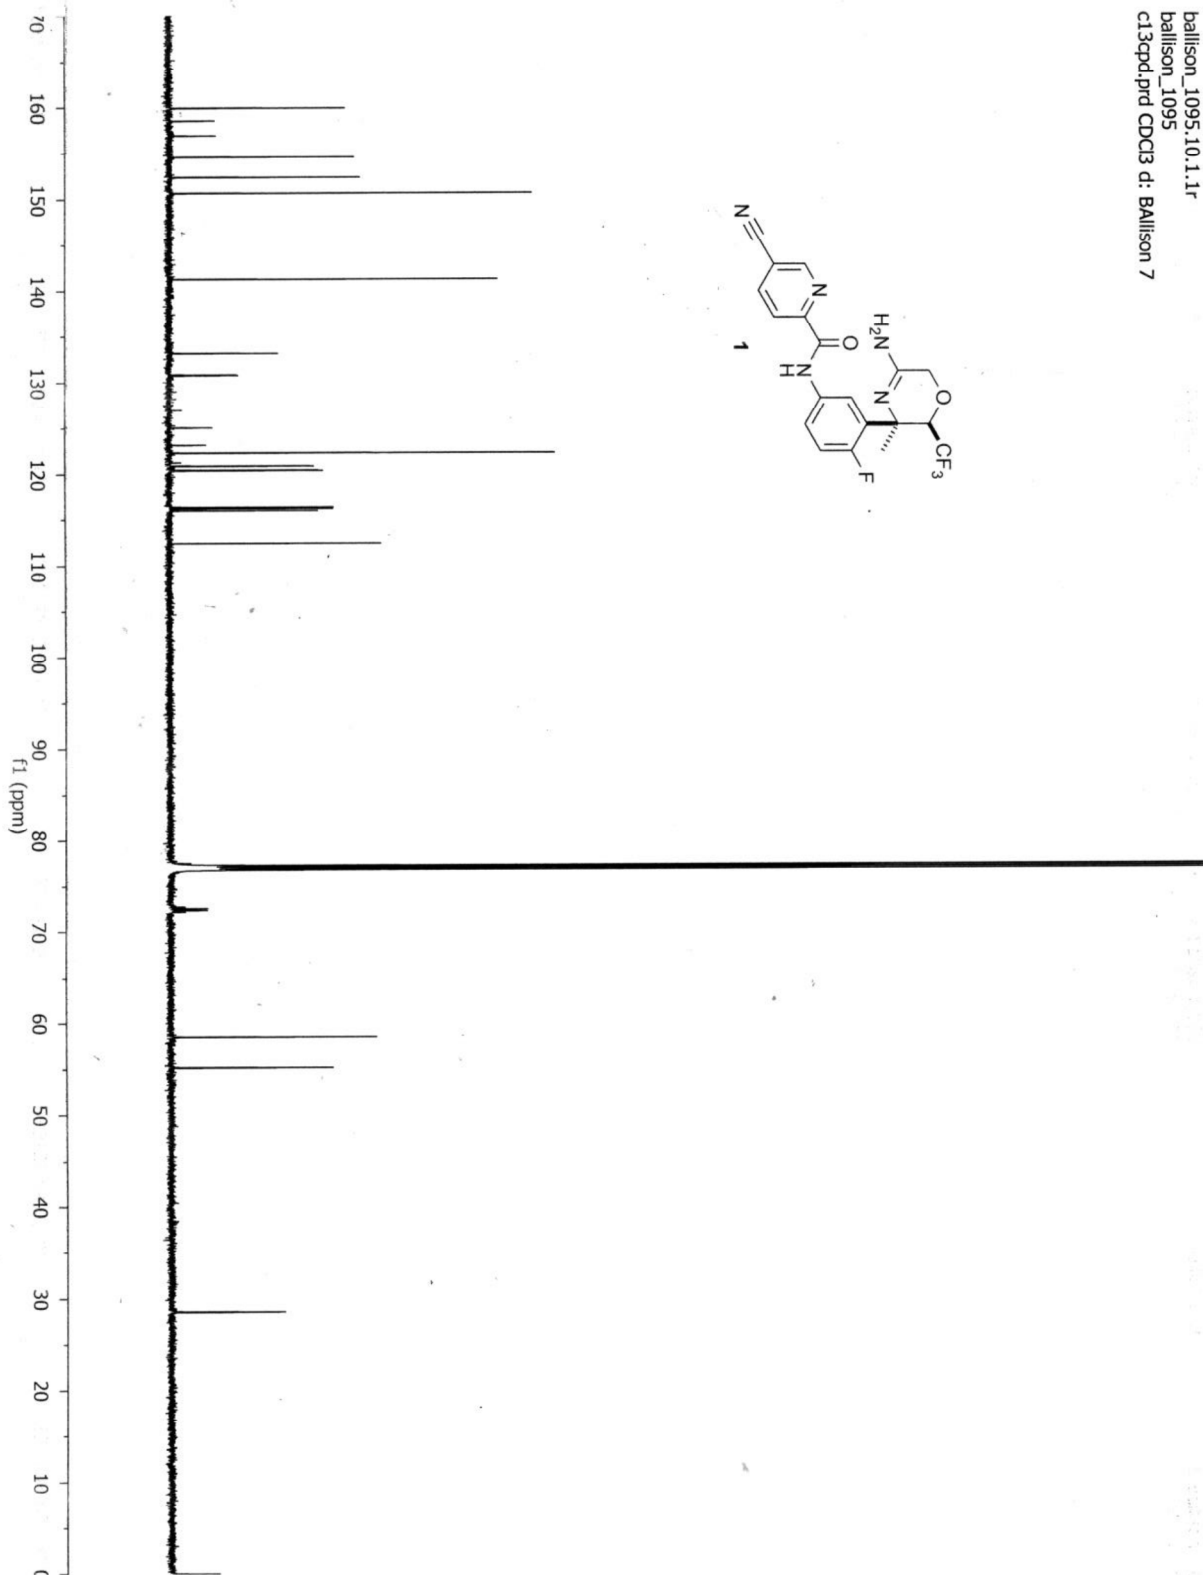

Figure S24.  $^{13}\text{C}$  NMR spectrum of 1.

Data File C:\CHEM32\1\DATA\GENERAL\JGB1 2012-01-04 11-30-16\001-0101.D  
Sample Name: ballison\_921 crude dried

```
=====
Acq. Operator   :                               Seq. Line :    1
Acq. Instrument : Instrument 1                   Location  : Vial 1
Injection Date  : 04-Jan-2012 11:33:18          Inj       :    1
                                                Inj Volume: 3.0 µl
Sequence File   : C:\CHEM32\1\DATA\GENERAL\JGB1 2012-01-04 11-30-16\JGB1.S
Method          : C:\CHEM32\1\DATA\GENERAL\JGB1 2012-01-04 11-30-16\5TO99_35C.M (Sequence Method)
Last changed    : 27-Jul-2010 10:57:13
Method Info     : 5-99% ACN, Eclipse XDB C18, 5 µm, 150x4.6mm
=====
```

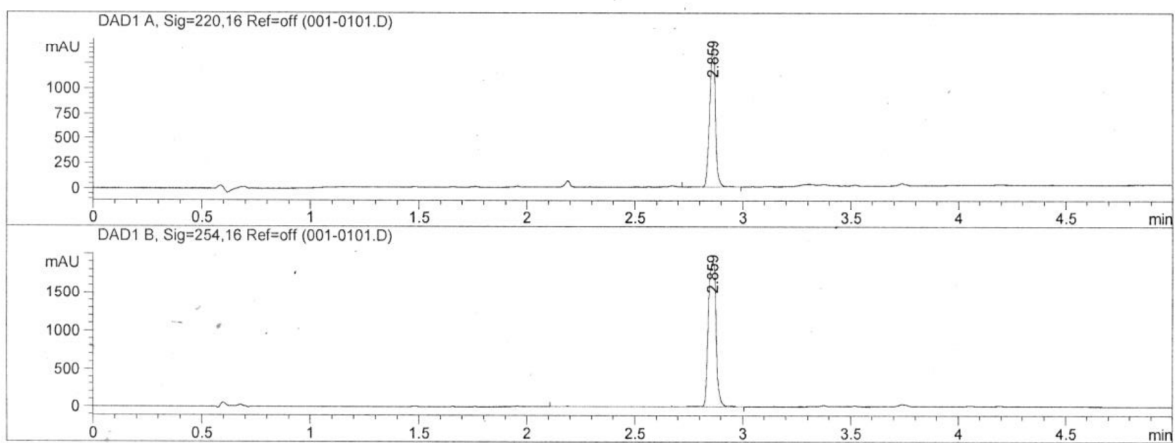

=====  
Area Percent Report  
=====

Sorted By : Retention Time  
Multiplier: : 1.0000  
Dilution: : 1.0000  
Use Multiplier & Dilution Factor with ISTDs

Signal 1: DAD1 A, Sig=220,16 Ref=off  
Signal 2: DAD1 B, Sig=254,16 Ref=off

| Peak # | RetTime [min] | Sig | Type | Area [mAU*s] | Height [mAU] | Area %  |
|--------|---------------|-----|------|--------------|--------------|---------|
| 1      | 2.859         | 2   | BB   | 4829.85547   | 1881.63916   | 64.8125 |
| 2      | 2.859         | 1   | VB   | 2622.19189   | 1338.22729   | 35.1875 |

Totals : 7452.04736 3219.86646

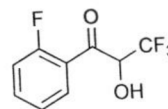

15

=====  
\*\*\* End of Report \*\*\*

Figure S25. HPLC chromatogram of 15.

Data File C:\CHEM32\1\DATA\GENERAL\JGB1 2012-01-30 10-42-25\001-0201.D  
Sample Name: ballison\_930 bulk rex material

=====

|                   |                      |              |        |
|-------------------|----------------------|--------------|--------|
| Acq. Operator :   |                      | Seq. Line :  | 2      |
| Acq. Instrument : | Instrument 1         | Location :   | Vial 1 |
| Injection Date :  | 30-Jan-2012 10:54:49 | Inj :        | 1      |
|                   |                      | Inj Volume : | 3.0 µl |

Sequence File : C:\CHEM32\1\DATA\GENERAL\JGB1 2012-01-30 10-42-25\JGB1.S  
Method : C:\CHEM32\1\DATA\GENERAL\JGB1 2012-01-30 10-42-25\5TO99\_35C.M (Sequence Method)  
Last changed : 27-Jul-2010 10:57:13  
Method Info : 5-99% ACN, Eclipse XDB C18, 5 µm, 150x4.6mm

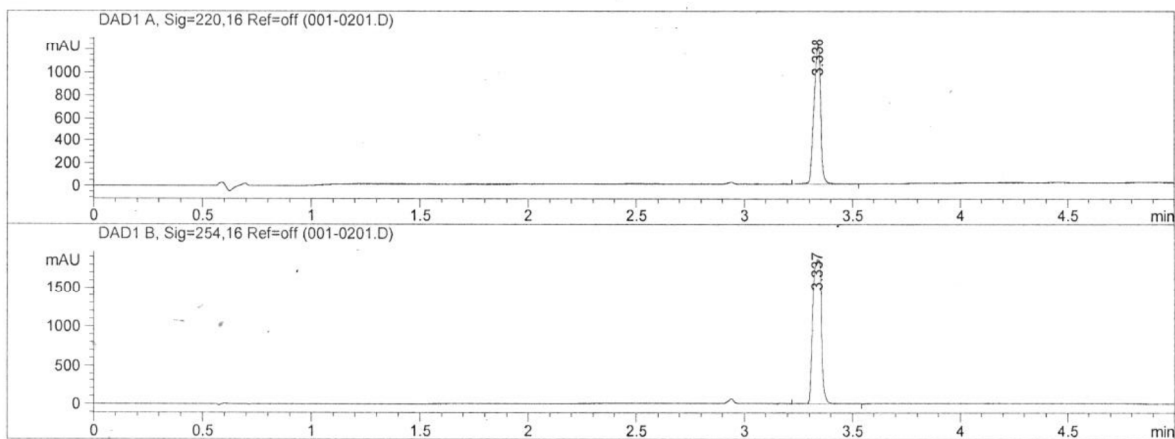

=====  
Area Percent Report  
=====

Sorted By : Retention Time  
Multiplier: : 1.0000  
Dilution: : 1.0000  
Use Multiplier & Dilution Factor with ISTDs

Signal 1: DAD1 A, Sig=220,16 Ref=off  
Signal 2: DAD1 B, Sig=254,16 Ref=off

| Peak # | RetTime [min] | Sig | Type | Area [mAU*s] | Height [mAU] | Area %  |
|--------|---------------|-----|------|--------------|--------------|---------|
| 1      | 3.337         | 2   | BB   | 5111.39209   | 1867.87769   | 65.9035 |
| 2      | 3.338         | 1   | BB   | 2644.47607   | 1182.93445   | 34.0965 |

Totals : 7755.86816 3050.81213

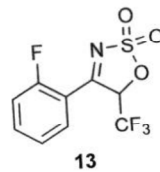

=====  
\*\*\* End of Report \*\*\*  
=====

Figure S26. HPLC chromatogram of 13.

Data File C:\CHEM32\1\DATA\GENERAL\JGB1 2012-02-07 10-42-39\002-0101.D  
 Sample Name: ballison\_937 2nd crop

```

=====
Acq. Operator   :                               Seq. Line :    1
Acq. Instrument : Instrument 1                   Location  : Vial 2
Injection Date  : 07-Feb-2012 10:45:34         Inj       :    1
                                                Inj Volume: 3.0 µl

Sequence File   : C:\CHEM32\1\DATA\GENERAL\JGB1 2012-02-07 10-42-39\JGB1.S
Method          : C:\CHEM32\1\DATA\GENERAL\JGB1 2012-02-07 10-42-39\5TO99_35C.M (Sequence Method)
Last changed   : 27-Jul-2010 10:57:13
Method Info    : 5-99% ACN, Eclipse XDB C18, 5 µm, 150x4.6mm
=====
  
```

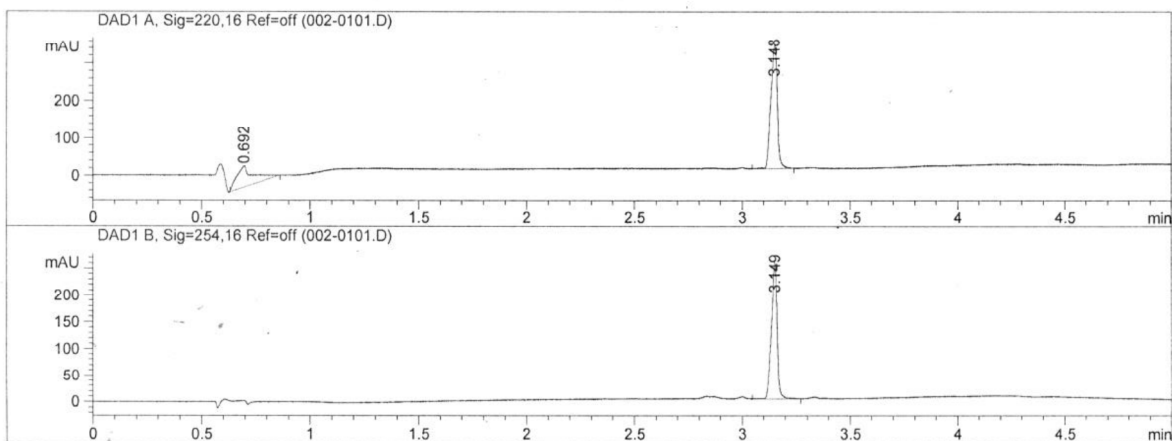

=====  
 Area Percent Report  
 =====

```

Sorted By      :      Retention Time
Multiplier:    :      1.0000
Dilution:      :      1.0000
Use Multiplier & Dilution Factor with ISTDs
  
```

```

Signal 1: DAD1 A, Sig=220,16 Ref=off
Signal 2: DAD1 B, Sig=254,16 Ref=off
  
```

| Peak # | RetTime [min] | Sig | Type | Area [mAU*s] | Height [mAU] | Area %  |
|--------|---------------|-----|------|--------------|--------------|---------|
| 1      | 0.692         | 1   | BB   | 298.16977    | 50.41683     | 20.2619 |
| 2      | 3.148         | 1   | BB   | 700.86938    | 318.06860    | 47.6271 |
| 3      | 3.149         | 2   | BB   | 472.53772    | 238.99857    | 32.1110 |

```
Totals :                1471.57687  607.48400
```

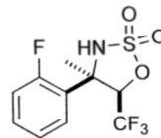

rac-12

=====  
 \*\*\* End of Report \*\*\*

Figure S27. HPLC chromatogram of rac-12.

Data File C:\CHEM32\1\DATA\GENERAL\JGB1 2012-05-01 13-53-48\003-0301.D  
 Sample Name: ballison\_1073 product

```

=====
Acq. Operator   :                               Seq. Line :    3
Acq. Instrument : Instrument 1                   Location  : Vial 3
Injection Date  : 01-May-2012 14:12:59         Inj       :    1
                                                Inj Volume: 3.0 µl
Sequence File   : C:\CHEM32\1\DATA\GENERAL\JGB1 2012-05-01 13-53-48\JGB1.S
Method          : C:\CHEM32\1\DATA\GENERAL\JGB1 2012-05-01 13-53-48\5TO99_35C.M (Sequence Method)
Last changed    : 27-Jul-2010 10:57:13
Method Info     : 5-99% ACN, Eclipse XDB C18, 5 µm, 150x4.6mm
=====
  
```

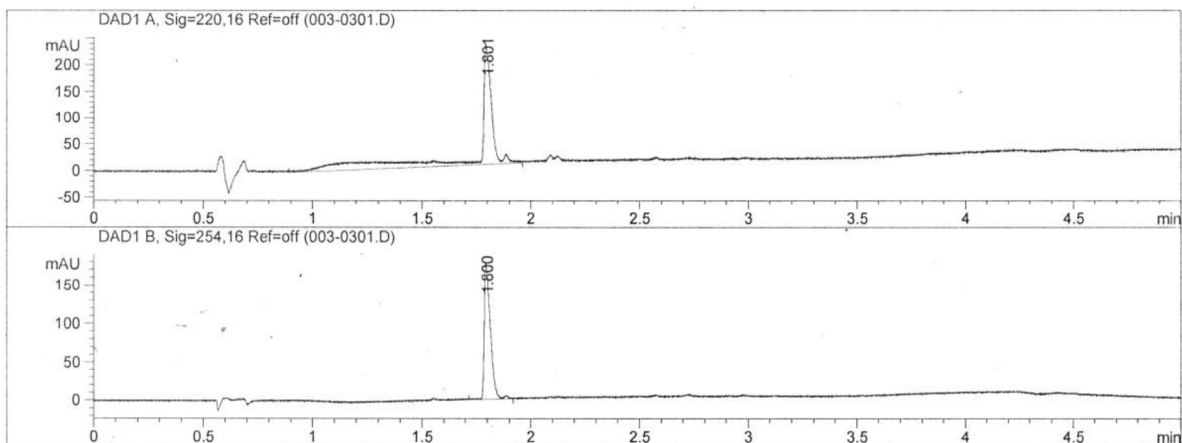

=====  
 Area Percent Report  
 =====

```

Sorted By      :      Retention Time
Multiplier:    :      1.0000
Dilution:      :      1.0000
Use Multiplier & Dilution Factor with ISTDs
  
```

```

Signal 1: DAD1 A, Sig=220,16 Ref=off
Signal 2: DAD1 B, Sig=254,16 Ref=off
  
```

| Peak # | RetTime [min] | Sig | Type | Area [mAU*s] | Height [mAU] | Area %  |
|--------|---------------|-----|------|--------------|--------------|---------|
| 1      | 1.800         | 2   | BB   | 353.86276    | 136.43169    | 25.9080 |
| 2      | 1.801         | 1   | BB   | 1011.98248   | 188.38135    | 74.0920 |

```
Totals :                1365.84525  324.81303
```

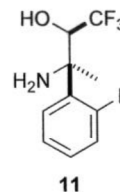

=====  
 \*\*\* End of Report \*\*\*

Figure S28. HPLC chromatogram of 11.

Data File C:\CHEM32\1\DATA\GENERAL\JGB1 2012-05-03 15-01-42\001-0101.D  
 Sample Name: ballison\_1076 isolated product

```

=====
Acq. Operator   :                               Seq. Line :    1
Acq. Instrument : Instrument 1                   Location  : Vial 1
Injection Date  : 03-May-2012 15:04:27         Inj       :    1
                                                Inj Volume: 3.0 µl
Sequence File   : C:\CHEM32\1\DATA\GENERAL\JGB1 2012-05-03 15-01-42\JGB1.S
Method          : C:\CHEM32\1\DATA\GENERAL\JGB1 2012-05-03 15-01-42\5TO99_35C.M (Sequence Method)
Last changed    : 27-Jul-2010 10:57:13
Method Info     : 5-99% ACN, Eclipse XDB C18, 5 µm, 150x4.6mm
=====
  
```

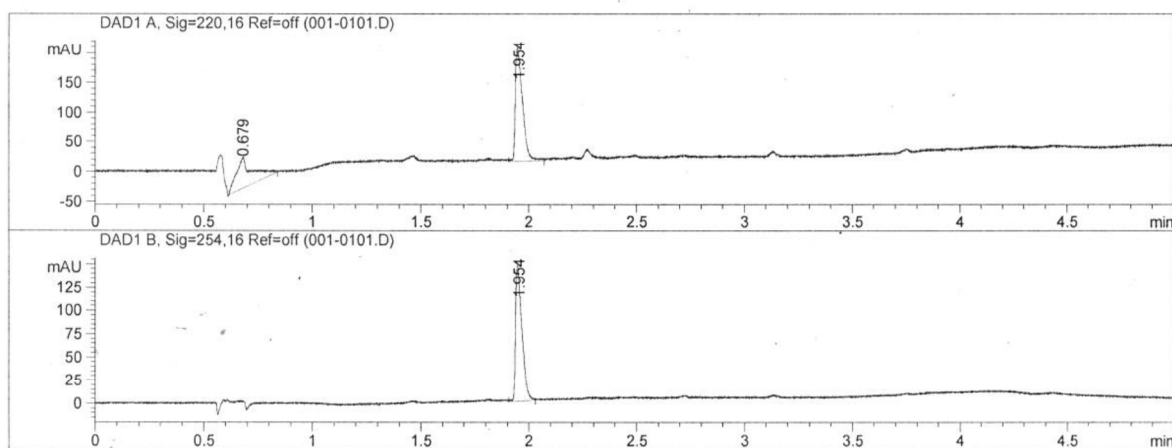

Area Percent Report

```

=====
Sorted By      :      Retention Time
Multiplier:    :      1.0000
Dilution:      :      1.0000
Use Multiplier & Dilution Factor with ISTDs
  
```

```

Signal 1: DAD1 A, Sig=220,16 Ref=off
Signal 2: DAD1 B, Sig=254,16 Ref=off
  
```

| Peak # | RetTime [min] | Sig | Type | Area [mAU*s] | Height [mAU] | Area %  |
|--------|---------------|-----|------|--------------|--------------|---------|
| 1      | 0.679         | 1   | BB   | 260.61084    | 45.55235     | 25.8199 |
| 2      | 1.954         | 2   | BB   | 301.34943    | 131.94470    | 29.8560 |
| 3      | 1.954         | 1   | BB   | 447.38214    | 177.02893    | 44.3241 |

Totals :                    1009.34241   354.52598

\*\*\* End of Report \*\*\*

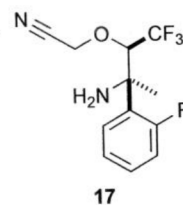

**Figure S29.** HPLC chromatogram of 17.

Data File C:\CHEM32\1\DATA\GENERAL\JGB1 2012-05-07 14-17-42\006-0101.D  
Sample Name: ballison\_1078 crude product

=====

|                 |   |                      |            |   |        |
|-----------------|---|----------------------|------------|---|--------|
| Acq. Operator   | : |                      | Seq. Line  | : | 1      |
| Acq. Instrument | : | Instrument 1         | Location   | : | Vial 6 |
| Injection Date  | : | 07-May-2012 14:20:03 | Inj        | : | 1      |
|                 |   |                      | Inj Volume | : | 3.0 µl |

Sequence File : C:\CHEM32\1\DATA\GENERAL\JGB1 2012-05-07 14-17-42\JGB1.S  
Method : C:\CHEM32\1\DATA\GENERAL\JGB1 2012-05-07 14-17-42\5TO99\_35C.M (Sequence Method)  
Last changed : 27-Jul-2010 10:57:13  
Method Info : 5-99% ACN, Eclipse XDB C18, 5 µm, 150x4.6mm

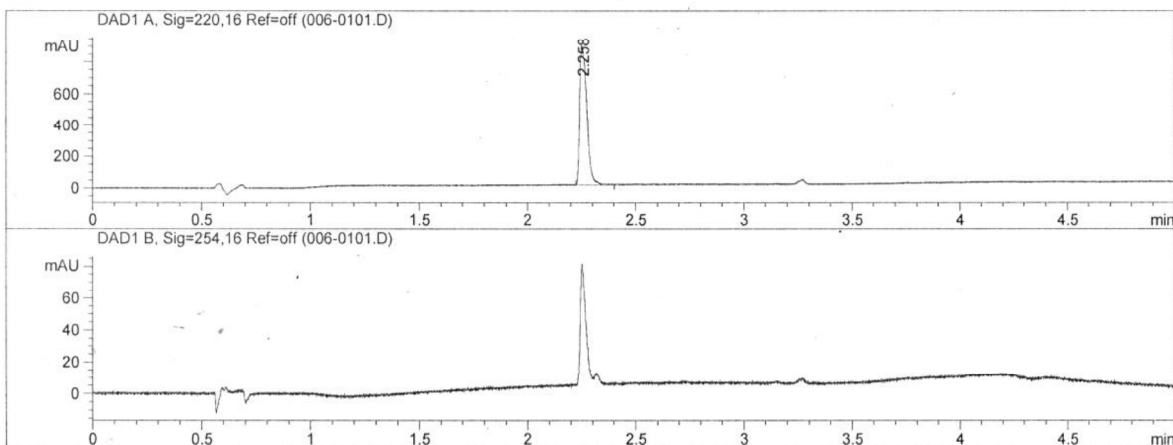

=====  
Area Percent Report  
=====

Sorted By : Retention Time  
Multiplier: : 1.0000  
Dilution: : 1.0000  
Use Multiplier & Dilution Factor with ISTDs

Signal 1: DAD1 A, Sig=220,16 Ref=off

| Peak # | RetTime [min] | Sig | Type | Area [mAU*s] | Height [mAU] | Area %   |
|--------|---------------|-----|------|--------------|--------------|----------|
| 1      | 2.258         | 1   | BB   | 2040.04846   | 812.54700    | 100.0981 |

Totals : 2038.04846 810.54700

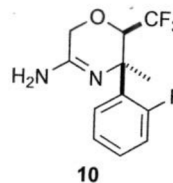

=====  
\*\*\* End of Report \*\*\*

Figure S30. HPLC chromatogram of 10.

Data File C:\CHEM32\1\DATA\GENERAL\JGB1 2012-05-11 16-44-01\001-0101.D  
 Sample Name: ballison\_1079 TBME after NaOH wash

```

=====
Acq. Operator   :                               Seq. Line :    1
Acq. Instrument : Instrument 1                  Location  : Vial 1
Injection Date  : 11-May-2012 16:46:53         Inj       :    1
                                              Inj Volume: 3.0 µl
Sequence File   : C:\CHEM32\1\DATA\GENERAL\JGB1 2012-05-11 16-44-01\JGB1.S
Method          : C:\CHEM32\1\DATA\GENERAL\JGB1 2012-05-11 16-44-01\5TO99_35C.M (Sequence Method)
Last changed    : 27-Jul-2010 10:57:13
Method Info     : 5-99% ACN, Eclipse XDB C18, 5 µm, 150x4.6mm
=====
    
```

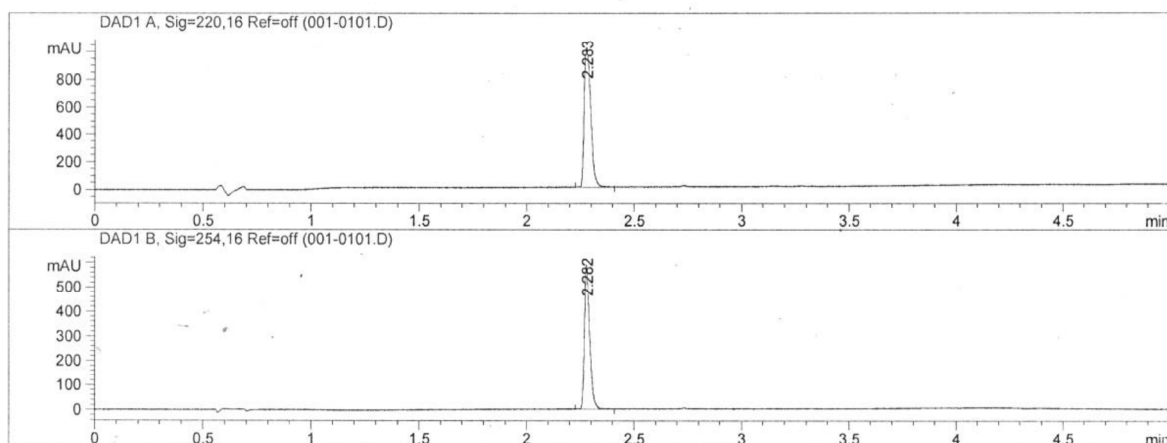

Area Percent Report

```

Sorted By      :          Retention Time
Multiplier:    :          1.0000
Dilution:      :          1.0000
Use Multiplier & Dilution Factor with ISTDs
    
```

Signal 1: DAD1 A, Sig=220,16 Ref=off  
 Signal 2: DAD1 B, Sig=254,16 Ref=off

| Peak # | RetTime [min] | Sig | Type | Area [mAU*s] | Height [mAU] | Area %  |
|--------|---------------|-----|------|--------------|--------------|---------|
| 1      | 2.282         | 2   | BB   | 1007.10522   | 468.54651    | 31.7918 |
| 2      | 2.283         | 1   | BB   | 2160.70654   | 917.73279    | 68.2082 |

Totals : 3167.81177 1386.27930

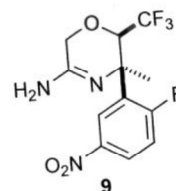

\*\*\* End of Report \*\*\*

Figure S31. HPLC chromatogram of 9.



Data File C:\CHEM32\1\DATA\GENERAL\JGB1 2012-05-15 22-04-26\001-0101.D  
 Sample Name: ballison\_1088 flashed product

```

=====
Acq. Operator   :                               Seq. Line :    1
Acq. Instrument : Instrument 1                   Location  : Vial 1
Injection Date  : 15-May-2012 22:07:19         Inj       :    1
                                                Inj Volume: 3.0 µl
Sequence File   : C:\CHEM32\1\DATA\GENERAL\JGB1 2012-05-15 22-04-26\JGB1.S
Method          : C:\CHEM32\1\DATA\GENERAL\JGB1 2012-05-15 22-04-26\5T099_35C.M (Sequence Method)
Last changed    : 27-Jul-2010 10:57:13
Method Info     : 5-99% ACN, Eclipse XDB C18, 5 µm, 150x4.6mm
=====
  
```

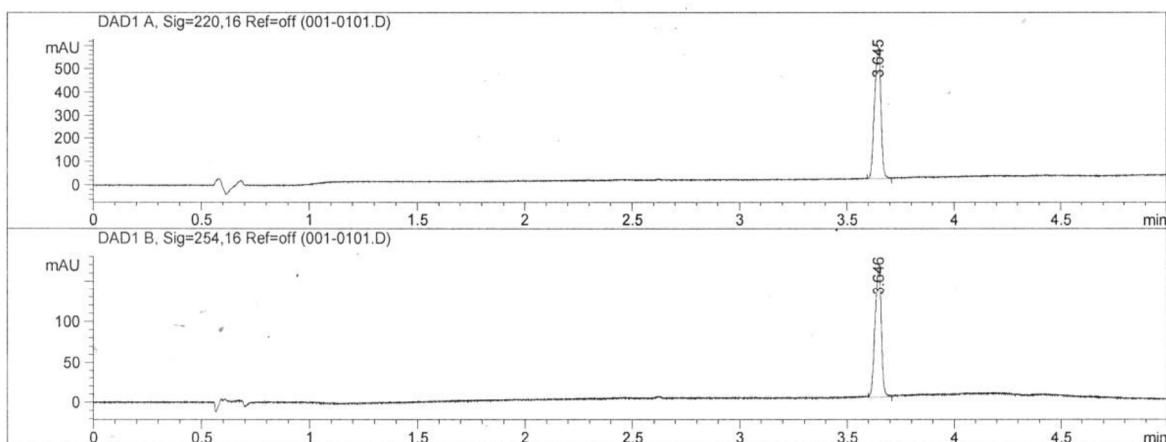

=====  
 Area Percent Report  
 =====

```

Sorted By      :      Retention Time
Multiplier:    :      1.0000
Dilution:      :      1.0000
Use Multiplier & Dilution Factor with ISTDs
  
```

```

Signal 1: DAD1 A, Sig=220,16 Ref=off
Signal 2: DAD1 B, Sig=254,16 Ref=off
  
```

| Peak # | RetTime [min] | Sig | Type | Area [mAU*s] | Height [mAU] | Area %  |
|--------|---------------|-----|------|--------------|--------------|---------|
| 1      | 3.645         | 1   | BB   | 1182.91589   | 542.96851    | 77.9695 |
| 2      | 3.646         | 2   | BB   | 334.23630    | 157.29256    | 22.0305 |

```
Totals :                1517.15219  700.26106
```

=====  
 \*\*\* End of Report \*\*\*  
 =====

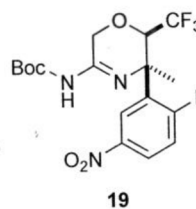

**Figure S32.** HPLC chromatogram of **19**.



Data File C:\CHEM32\1\DATA\GENERAL\JGB1 2012-05-19 23-11-53\001-0101.D  
 Sample Name: ballison\_1094 final org layer

```

=====
Acq. Operator   :                               Seq. Line :    1
Acq. Instrument : Instrument 1                   Location  : Vial 1
Injection Date  : 19-May-2012 23:14:39          Inj       :    1
                                                    Inj Volume: 3.0 µl
Sequence File   : C:\CHEM32\1\DATA\GENERAL\JGB1 2012-05-19 23-11-53\JGB1.S
Method          : C:\CHEM32\1\DATA\GENERAL\JGB1 2012-05-19 23-11-53\5TO99_35C.M (Sequ
Last changed    : 27-Jul-2010 10:57:13
Method Info     : 5-99% ACN, Eclipse XDB C18, 5 µm, 150x4.6mm
=====
  
```

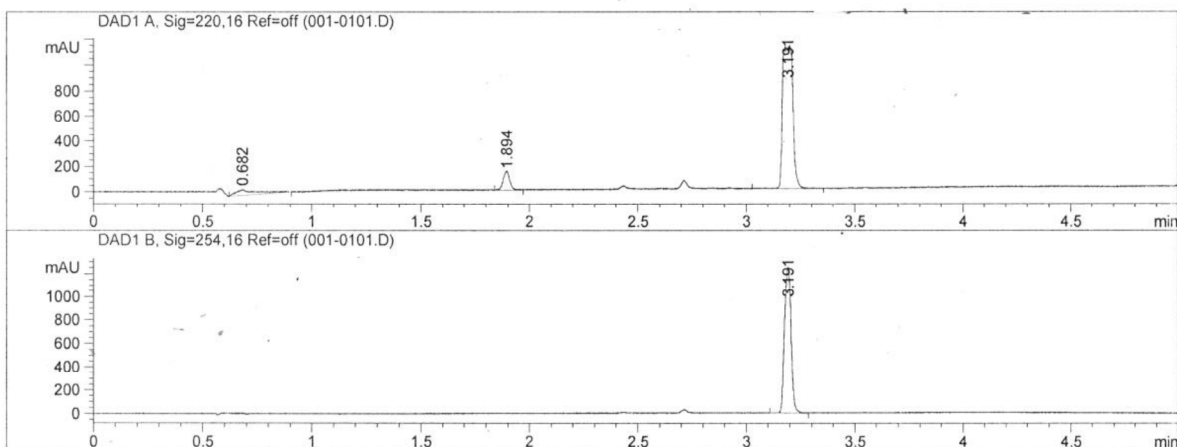

=====  
 Area Percent Report  
 =====

```

Sorted By      :      Retention Time
Multiplier:    :      1.0000
Dilution:      :      1.0000
Use Multiplier & Dilution Factor with ISTDs
  
```

```

Signal 1: DAD1 A, Sig=220,16 Ref=off
Signal 2: DAD1 B, Sig=254,16 Ref=off
  
```

| Peak # | RetTime [min] | Sig | Type | Area [mAU*s] | Height [mAU] | Area %  |
|--------|---------------|-----|------|--------------|--------------|---------|
| 1      | 0.682         | 1   | BB   | 304.38477    | 41.94170     | 4.3465  |
| 2      | 1.894         | 1   | BB   | 320.65506    | 136.33331    | 4.5788  |
| 3      | 3.191         | 1   | BB   | 3740.24951   | 1105.11914   | 53.4095 |
| 4      | 3.191         | 2   | BB   | 2637.67920   | 1212.81763   | 37.6652 |

Totals :                    7002.96854 2496.21178

=====  
 \*\*\* End of Report \*\*\*

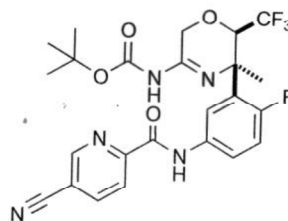

**Figure S34.** HPLC chromatogram of Boc-protected **1**.

Data File C:\CHEM32\1\DATA\GENERAL\JGB1 2012-05-22 09-26-49\003-0101.D  
Sample Name: ballison\_1095 final

=====

|                 |   |                      |            |   |        |
|-----------------|---|----------------------|------------|---|--------|
| Acq. Operator   | : |                      | Seq. Line  | : | 1      |
| Acq. Instrument | : | Instrument 1         | Location   | : | Vial 3 |
| Injection Date  | : | 22-May-2012 09:29:22 | Inj        | : | 1      |
|                 |   |                      | Inj Volume | : | 3.0 µl |

Sequence File : C:\CHEM32\1\DATA\GENERAL\JGB1 2012-05-22 09-26-49\JGB1.S  
Method : C:\CHEM32\1\DATA\GENERAL\JGB1 2012-05-22 09-26-49\5TO99\_35C.M (Sequence Method)  
Last changed : 27-Jul-2010 10:57:13  
Method Info : 5-99% ACN, Eclipse XDB C18, 5 µm, 150x4.6mm

Sample Info : triturated from toluene, dried high vac, 70 °C, o/n

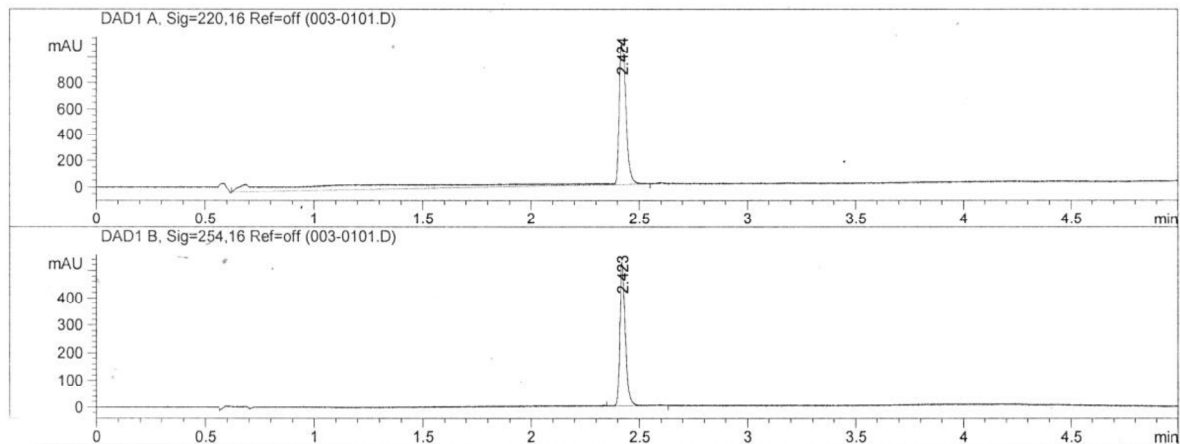

=====  
Area Percent Report  
=====

Sorted By : Retention Time  
Multiplier: : 1.0000  
Dilution: : 1.0000  
Use Multiplier & Dilution Factor with ISTDs

Signal 1: DAD1 A, Sig=220,16 Ref=off  
Signal 2: DAD1 B, Sig=254,16 Ref=off

| Peak # | RetTime [min] | Sig | Type | Area [mAU*s] | Height [mAU] | Area %  |
|--------|---------------|-----|------|--------------|--------------|---------|
| 1      | 2.423         | 2   | BB   | 929.98712    | 489.57022    | 15.7597 |
| 2      | 2.424         | 1   | BB   | 4971.06787   | 1060.04871   | 84.2403 |

Totals : 5901.05499 1549.61893

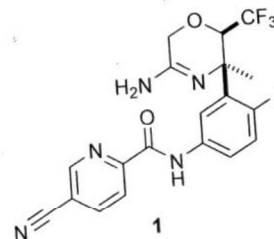

=====  
\*\*\* End of Report \*\*\*  
=====

Figure S35. HPLC chromatogram of 1.
